# Supplementary material for: Optimising medication management for polymedicated home-dwelling older adults with multiple chronic conditions: a mixed-methods study protocol
Source: PubMed Central journal article supplement — BMJ Open. 2019 Oct 25;9(10):e030030. doi: 10.1136/bmjopen-2019-030030 (PMC6830655; doi:10.1136/bmjopen-2019-030030), 2019-10-25
Supplement: bmjopen-2019-030030.draft_revisions.pdf [file bmjopen-2019-030030.draft_revisions.pdf]

# BMJ Open

BMJ Open is committed to open peer review. As part of this commitment we make the peer review history of every article we publish publicly available.

When an article is published we post the peer reviewers' comments and the authors' responses online. We also post the versions of the paper that were used during peer review. These are the versions that the peer review comments apply to.

The versions of the paper that follow are the versions that were submitted during the peer review process. They are not the versions of record or the final published versions. They should not be cited or distributed as the published version of this manuscript.

BMJ Open is an open access journal and the full, final, typeset and author-corrected version of record of the manuscript is available on our site with no access controls, subscription charges or pay-per-view fees (<http://bmjopen.bmj.com>).

If you have any questions on BMJ Open's open peer review process please email [info.bmjopen@bmj.com](mailto:info.bmjopen@bmj.com)

# BMJ Open

## Protocol for a mixed methods study to optimise medication management for polymedicated home-dwelling older adults with multiple chronic conditions

|                               |                                                                                                                                                                                                                                                                                                                                                                                                                                                                                                                                                                                                                                                                                                                         |
|-------------------------------|-------------------------------------------------------------------------------------------------------------------------------------------------------------------------------------------------------------------------------------------------------------------------------------------------------------------------------------------------------------------------------------------------------------------------------------------------------------------------------------------------------------------------------------------------------------------------------------------------------------------------------------------------------------------------------------------------------------------------|
| Journal:                      | <i>BMJ Open</i>                                                                                                                                                                                                                                                                                                                                                                                                                                                                                                                                                                                                                                                                                                         |
| Manuscript ID                 | bmjopen-2019-030030                                                                                                                                                                                                                                                                                                                                                                                                                                                                                                                                                                                                                                                                                                     |
| Article Type:                 | Protocol                                                                                                                                                                                                                                                                                                                                                                                                                                                                                                                                                                                                                                                                                                                |
| Date Submitted by the Author: | 23-Feb-2019                                                                                                                                                                                                                                                                                                                                                                                                                                                                                                                                                                                                                                                                                                             |
| Complete List of Authors:     | Pereira, Filipa; School of Health Sciences HES-SO University of Applied Sciences and Arts Western Switzerland,<br>Roux, Pauline; University of Lausanne, Research Center for Psychology of Health, Aging and Sport Examination<br>Delefosse, Marie; University of Lausanne, Research Center for Psychology of Health, Aging and Sport Examination<br>Von-Gunten, Armin; University Hospital of Lausanne, Service of Old Age Psychiatry<br>Wernli, Boris; FORS, Swiss Centre of Expertise in the Social Sciences, University of Lausanne<br>Martins, Maria Manuela; Escola Superior de Enfermagem do Porto<br>Verloo, Henk; School of Health Sciences HES-SO University of Applied Sciences and Arts Western Switzerland |
| Keywords:                     | Health & safety < HEALTH SERVICES ADMINISTRATION & MANAGEMENT, PREVENTIVE MEDICINE, PRIMARY CARE, Adverse events < THERAPEUTICS                                                                                                                                                                                                                                                                                                                                                                                                                                                                                                                                                                                         |
|                               |                                                                                                                                                                                                                                                                                                                                                                                                                                                                                                                                                                                                                                                                                                                         |

SCHOLARONE™  
Manuscripts

1  
2  
3 **Protocol for a mixed methods study to optimise medication management for**  
4 **polymedicated home-dwelling older adults with multiple chronic conditions**  
5  
6  
7

---

8 Filipa PEREIRA (1), Pauline ROUX (2), Marie SANTIAGO-DELEFOSSE (3), Armin VON  
9 GUNTEN (4), Boris WERNLI (5), Maria Manuela MARTINS (6), Henk VERLOO (7)  
10  
11  
12  
13  
14

15 **Principal and Corresponding author**

16 **(1)** PhD(c), Scientific Collaborator

17 School of Health Sciences

18 HES-SO University of Applied Sciences and Arts Western Switzerland

19 5, Chemin de l'Agasse

20 CH-1950 Sion, Switzerland

21 Email: [filipa.pereira@hevs.ch](mailto:filipa.pereira@hevs.ch); Phone: +41 78 666 17 00; Fax: +41 27 606 84 00  
22  
23  
24  
25  
26  
27  
28

29 **Co-author**

30 **(2)** PhD, Junior Lecturer

31 University of Lausanne, Research Center for Psychology of Health, Aging and Sport  
32 Examination  
33

34 Quartier UNIL-Mouline

35 Bâtiment Géopolis

36 CH-1015 Lausanne, Switzerland

37 Email: [pauline.roux@unil.ch](mailto:pauline.roux@unil.ch); Phone: +41 21 692 32 56  
38  
39  
40  
41  
42  
43  
44

45 **Co-author**

46 **(3)** PhD, Full Professor

47 University of Lausanne, Research Center for Psychology of Health, Aging and Sport  
48 Examination  
49

50 Quartier UNIL-Mouline

51 Bâtiment Géopolis

52 CH-1015 Lausanne, Switzerland

53 Email: [marie.santiago@unil.ch](mailto:marie.santiago@unil.ch)  
54  
55  
56  
57  
58  
59  
60

**Co-author**

(4) MD, Full Professor

Service of Old Age Psychiatry, Lausanne University Hospital

Email: [armin.von-gunten@chuv.ch](mailto:armin.von-gunten@chuv.ch); Phone: +41 21 314 27 95

**Co-author**

(5) PhD, Full Professor

FORS, Swiss Centre of Expertise in the Social Sciences, University of Lausanne, Expert in Database Processing

Email: [boris.wernli@fors.unil.ch](mailto:boris.wernli@fors.unil.ch); Phone: +41 21 692 37 23

**Co-author**

(6) PhD, Full Professor

Higher School of Nursing of Porto

Institute of Biomedical Sciences Abel Salazar, University of Porto

Rua Dr. António Bernardino de Almeida

4200-072 Porto, Portugal

Email: [mmartins@esenf.pt](mailto:mmartins@esenf.pt); Phone: +351 22 507 35 00

**Co-author**

(7) PhD, Full Professor

School of Health Sciences

HES-SO University of Applied Sciences and Arts Western Switzerland

5, Chemin de l'Agasse

CH-1951 Sion, Switzerland

Email: [henk.verloo@hevs.ch](mailto:henk.verloo@hevs.ch); Phone: +41 27 606 84 34

## 1 **ABSTRACT**

### 2 **Introduction:**

3 Optimal medication management is one of the basic conditions necessary for home-dwelling  
4 older adults living with multiple chronic conditions (OAMCC) to be able to remain at home  
5 and preserve their quality of life. Currently, the reasons for such high numbers of emergency  
6 department visits and the very significant rate of hospitalisations for OAMCC, due to  
7 medication-related problems, is poorly explored. This study aims to reveal the current state of  
8 medication management practices of polymedicated home-dwelling OAMCC and to make  
9 proposals for improving clinical and medication pathways through an innovative and integrated  
10 model for supporting medication management and preventing adverse health outcomes.

11 **Methods and analysis:** A mixed methods study will address the medication management of  
12 polymedicated, home-dwelling OAMCC. Its explanatory sequential design will involve two  
13 major phases conducted sequentially over time. The quantitative phase will consist of  
14 retrospectively exploiting the last five years of electronic patient records from a local hospital  
15 (N ≈ 50,000) in order to identify the different profiles—made up of medication and  
16 environment-related factors—of the polymedicated, home-dwelling OAMCC at risk of  
17 hospitalisation, emergency department visits, hospital readmission (notably for MRPs),  
18 institutionalisation or early death. The qualitative study will involve: a) obtaining and  
19 understanding the medication management practices and experiences of the identified profiles  
20 extracted from the hospital data of OAMCC who will be interviewed at home (N ≈ 30); b)  
21 collecting and analysing the perspectives of the formal and informal caregivers involved in  
22 medication management at home in order to cross-reference perspectives about this important  
23 dimension of care at home.

24 **Ethics and dissemination :** Ethical approval has been obtained from the Human Research  
25 Ethics Committee of the Canton Vaud (2018-02196). Findings will be disseminated in peer-  
26 reviewed journals, professional conferences and other knowledge transfer activities with  
27 primary healthcare providers, hospital care units, informal caregivers' and patients'  
28 associations.

### 29 **Keywords**

30 Polymedication, home-dwelling older adults, multiples chronic conditions, medication  
31 management, mixed methods research, protocol, medication-related problems, hospitalisation,  
32 retrospective review

1  
2  
3  
4 33 **Strengths and limitations of this study**  
5

- 6 34 • This mixed methodology will rely on a closely coordinated combination of methods and  
7 on the utilization of valuable existing data under-exploited to date (electronic patient  
8 35 records and Resident Assessment Instrument-Home Care data).  
9 36  
10 37 • The investigation draws upon an interprofessional and interdisciplinary approach,  
11 38 which associates general practitioners, community health care nurses, pharmacists and  
12 39 researchers in health psychology, old age psychiatry, nursing and survey methodology.  
13 40 • Our findings will contribute to the development of an evidence-based and innovative,  
14 41 cooperative model of medication management for polymedicated home-dwelling older  
15 42 adults with chronic conditions.  
16 43 • The study will be conducted in a single canton and its generalizability to other regions  
17 44 should be done with precaution.  
18  
19  
20  
21  
22  
23  
24  
25  
26  
27  
28  
29  
30  
31  
32  
33  
34  
35  
36  
37  
38  
39  
40  
41  
42  
43  
44  
45

## 46 INTRODUCTION

47 The number of older adults living at home with multiple chronic conditions (OAMCC) rises  
48 considerably around the world and has been estimated to affect 25.2% of people aged from 65  
49 to 79 and 41.3% of those aged 80 and over.<sup>1</sup>

50 These long-term health conditions require taking multiple medications<sup>2</sup>, known as  
51 polypharmacy (PP) when the daily intake corresponds to five or more medicines.<sup>3</sup>  
52 Polypharmacy places older adults at higher risk of medication-related problems (MRPs),  
53 including adverse medication reactions, medication errors and potentially inappropriate  
54 medications.<sup>4,5</sup> Potentially inappropriate medications are the intake of medicines for which the  
55 associated risks outweigh the potential benefits, particularly when more effective alternatives  
56 are available.<sup>6</sup> Consequently, MRPs can lead to a degradation of the patient's clinical condition,  
57 physical and cognitive decline, an exacerbation of chronic medical conditions and avoidable  
58 health costs.<sup>7,8</sup> Moreover, up to 25% of emergency department visits by home-dwelling  
59 OAMCC are due to MRPs.<sup>7</sup> However, 60% of MRPs in patients visiting the emergency  
60 department with non-specific complaints (such as weakness) may go undiagnosed, whereas  
61 83% of those MRPs may be responsible for acute morbidity.<sup>7</sup> MRPs are also a frequent cause  
62 of readmission, and they were the most frequent cause in one study that followed older patients  
63 for six months after hospital discharge.<sup>9</sup> Care-coordination problems, associated with low or  
64 suboptimal medication management, are all the more evident in the sensitive period of  
65 discharge home from hospital.<sup>8,10</sup> The complexity of OAMCC' care needs leads them to be  
66 significant users of health services and to consult many different health care professionals.<sup>11</sup>  
67 The number of health care professionals consulted by home-dwelling OAMCC has been  
68 directly associated with fragmented and uncoordinated care.<sup>10</sup> Moreover, different health care  
69 professionals may have different treatment preferences. Failure to coordinate care among  
70 home-dwelling OAMCC contributes to MRPs.<sup>10</sup>

71 In addition to role of health care professionals in medication management, informal caregivers  
72 play a vital role in ensuring safe and appropriate medication use by home-dwelling OAMCC,  
73 especially among those who may also have cognitive impairment.<sup>12-14</sup> Despite the important  
74 role of informal caregivers in medication management, several complications to do with their  
75 activities have been documented in relation to the time spent, anxiety making a mistake and the  
76 uncooperative behaviour of the home-dwelling OAMCC.<sup>15</sup> They are also confronted with  
77 difficulties in maintaining continuous supplies of medication, assisting with administration,

1  
2  
3  
4 78 making clinical judgements (e.g. in response to side effects and about over-the-counter  
5 79 medication), and solving conflictual communications or disagreements with the older adult<sup>15</sup>,  
6  
7 80 or even with health care professionals, with regards to ineffective and addictive medication  
8  
9 81 practices.<sup>12 15</sup>

10  
11 82 Nonetheless, many MRPs are preventable.<sup>5 7 16</sup> Studies about medicine-related hospitalisations  
12  
13 83 suggest that up to 58% may be preventable with appropriate primary care.<sup>5</sup> An essential strategy  
14  
15 84 for medicine-related hospitalisations prevention and medication safety is medication  
16  
17 85 reconciliation - the process of creating and maintaining a single list of the patient's current list  
18  
19 86 of medications.<sup>17</sup> This process allows a systematic and comprehensive review of all the  
20  
21 87 medications the patient is taking, reducing medication errors by a consistent communication  
22  
23 88 across transitions of care.<sup>18</sup>

24  
25 89 Therefore, optimising medication management among home-dwelling OAMCC requires  
26  
27 90 regular monitoring of MRPs, interprofessional collaboration across different health and social  
28  
29 91 care providers, organisations and departments<sup>10</sup> and medication reconciliation at every  
30  
31 92 transition of care including changes in the clinical setting, practitioner, or level of care.<sup>19</sup>

### 31 93 **Aim and Objectives**

32  
33 94 The study aim is to document the current state of medication management practices of  
34  
35 95 polymedicated home-dwelling OAMCC and to make proposals for improving clinical and  
36  
37 96 medication evidence-based pathways through an innovative and integrated model intended to  
38  
39 97 support medication management and to prevent adverse health outcomes. To achieve this aim,  
40  
41 98 three main objectives will guide this project:

42 99 The first objective is to carry out a **retrospective analysis of patients' hospital records**, their  
43  
44 100 medication and environment-related factors in order to identify those that increase the risk of  
45  
46 101 hospitalisation, emergency department visits, hospital readmission (notably due to MRPs),  
47  
48 102 institutionalisation or early death, among home-dwelling polymedicated OAMCC—factors that  
49  
50 103 prevent OAMCC from staying at home.

51 104 The second objective is to use a **prospective qualitative study** to explore and better understand  
52  
53 105 **the medication experiences and practices of home-dwelling OAMCC with different**  
54  
55 106 **profiles**. We seek to identify the skills and strategies developed by them to manage  
56  
57 107 polymedication within their social contexts and health trajectories despite possible cognitive  
58  
59 108 impairment and particularly after a recent hospitalisation.



1  
2  
3  
4 109 The third objective is to better understand the **roles and coordination of the different**  
5 **caregivers involved in the medication management of home-dwelling OAMCC.** We seek  
6 110  
7 to investigate the perspectives of both professional caregivers (community health care nurses,  
8 111  
9 pharmacists, general practitioners or specialist physicians) and non-professional/informal  
10 112  
11 caregivers (family members, friends or neighbours).  
12 113

## 14 114 **METHODS**

### 16 115 **Study design**

18 116 To enable us to meet our objectives, a mixed method study will address the medication  
19 117 management of polymedicated home-dwelling OAMCC.<sup>20</sup> There will be two major phases  
20 118 conducted sequentially over time: a quantitative data collection phase followed by a qualitative  
21 119 phase. The reasons for using an explanatory sequential design are, firstly, that existing data in  
22 120 electronic patient records from a local hospital will enable us to identify profiles affected by  
23 121 similar medication and environment-related factors among the polymedicated, home-dwelling  
24 122 OAMCC at risk of hospitalisation, emergency department visits, hospital readmission (notably  
25 123 due to MRPs), institutionalisation, or early death. Secondly, the identified profiles extracted  
26 124 from the hospital data will allow proceeding to a purposive sampling—of those polymedicated  
27 125 home-dwelling OAMCC who present with more risk factors—for the qualitative data collection  
28 126 focused on medication management at home.

### 38 127 **Phase 1, Retrospective Quantitative Analysis**

40 128 To fulfil the first objective, the purpose of the quantitative phase is to identify the different  
41 129 profiles—made up of factors related to medication and environment—of the polymedicated  
42 130 home-dwelling OAMCC at risk of hospitalisation, emergency department visits, hospital  
43 131 readmission (notably for MRPs), institutionalisation, or early death. A systematic, retrospective  
44 132 chart analysis of the electronic patient records from a local hospital over the last four years  
45 133 using the evidence-based methodology developed by Vassar & Holzmann will provide  
46 134 substantial clinical information.<sup>21</sup> Motheral et al.'s standardised extraction sheets will be  
47 135 adapted to explore and assess the data of older inpatients or ED-visiting home-dwelling older  
48 136 adult.<sup>22</sup> The four-year period was selected based on the availability of systematic, well-coded  
49 137 patient data using the Swiss-Diagnostic Related Groups (DRG)<sup>23</sup> and the Swiss surgery coding  
50 138 system (CHOP).<sup>24</sup>

### 139 ***Research population***

140 All home-dwelling OAMCC with somatic and/or mental health disorders who were  
141 hospitalised, rehospitalised or who consulted the emergency department at the partner hospital  
142 between 2015 and 2018 (estimated N= 50,000) will be included. The estimated sample of  
143 50,000 older adults' electronic inpatient charts are part of the 40,000 yearly adult inpatients in  
144 acute care units and more than 40,000 adult emergency department consultations yearly at the  
145 partner hospital.

### 146 ***Data Collection***

147 Sociodemographic data will include age, sex and environmental data such as a rural or urban  
148 domicile, and the presence of formal and/or informal caregivers. Clinical and health data will  
149 integrate primary ICD-10 diagnosis completed with the reason for hospitalisation or  
150 rehospitalisation due to MRPs. Supplementary filters will be added to discriminate  
151 polymedication, multi-morbidity (secondary ICD-10 diagnosis), physical and cognitive  
152 impairment documented in the clinical data files (Function Independence Measure, Mini-  
153 Mental State Examination, and Activities of Daily Living). In addition, data on length of stay,  
154 readmissions (number of admissions in the previous year, 30-day readmission and unplanned  
155 readmission), death during hospitalisation and medication data (number and types of  
156 medication treatments during hospitalisation, discharge and post-discharge medication  
157 changes) will be collected. A unique patient identification number will allow us to identify and  
158 analyse re-hospitalisation via the emergency department during the period from 2015 to 2018.

### 159 ***Data Analyses***

160 This retrospective investigation will allow us to identify the medication and environment-  
161 related factors that can increase the risk of hospitalisation, emergency department visits,  
162 readmission (notably due to MRPs), institutionalisation or early death. This retrospective  
163 analysis will serve to guide the qualitative study and lead to a purposive sampling of  
164 polymedicated home-dwelling OAMCC presenting with more risk factors.

165 The final outcome of the quantitative phase will be the identification of polymedicated home-  
166 dwelling OAMCC hospitalised or visiting the emergency department due to MRPs.<sup>25</sup>

### 167 **Phase 2, Prospective Patient-Centred Qualitative Analysis**

168 To meet the second and third objectives, a qualitative investigation, based on purposive  
169 sampling, will draw upon work done in a feasibility study.<sup>26</sup> This qualitative investigation will

1  
2  
3  
4 170 consist of collecting and understanding the medication practices and experiences of OAMCC  
5  
6 171 presenting with the risk factors identified in the first phase. The focus will be on identified  
7  
8 172 OAMCC who were recently hospitalised and are at risk of hospital readmission. The older adult  
9  
10 173 will be interviewed at home on two separate occasions. This methodology is a way to analyse  
11  
12 174 changes in their medication practises and their experiences following their recent  
13  
14 175 hospitalisation. The data collection tools include a walking-interview<sup>27</sup> based on a medication  
15  
16 176 journal and household photographs of where medication is stored. This allows us to focus on  
17  
18 177 the tangible practices of OAMCC and contextualises them within the private space of their daily  
19  
20 178 lives.

21 179 To discriminate the older adults' health profile, we will use the Resident Assessment Instrument  
22  
23 180 – Home-Care (RAI-HC) introduced by the Swiss Association for Home Care Services for all  
24  
25 181 home care services in 2004. Based on a comprehensive geriatric assessment, the RAI-HC not  
26  
27 182 only allows for the establishment of an individualised care plan, but it also generates quality  
28  
29 183 indicators, plans resource use, optimises the medication management process by monitoring  
30  
31 184 and documenting the number and types of medication and the persons involved in preparing  
32  
33 185 medication, and regularly assesses adherence to the medication prescribed.<sup>28</sup>

34 186 Furthermore, we will also collect and analyse the perspectives of the formal and informal  
35  
36 187 caregivers involved in medication management at home, to cross-reference perspectives about  
37  
38 188 this important dimension of care at home.

### 39 189 ***Research population***

40 190 The profiles of the polymedicated OAMCC hospitalised/rehospitalised or consulting the  
41  
42 191 emergency department, as identified in the retrospective investigation, will be used to select  
43  
44 192 participants for the qualitative investigation. A theoretical, purposive sampling will be carried  
45  
46 193 out. Based on Guest et al., we will recruit about 30 polymedicated OAMCC (until saturation of  
47  
48 194 data), all recently hospitalised (within the last 90 days) and at risk of hospital readmission.<sup>29</sup>  
49  
50 195 For each OAMCC participant an informal caregiver will also be integrated into the  
51  
52 196 investigation. We defined informal caregivers as any family member, neighbour or friend  
53  
54 197 assisting a dependent older adult with certain activities in their daily life. That assistance, help,  
55  
56 198 care or physical presence must be given on a regular basis, for at least two basic activities or  
57  
58 199 instrumental activities of daily living or to ensure patient safety, and for six months or more.<sup>30</sup>  
59  
60 200 The informal caregiver will be included in the study if the recruited older adult identifies that

201 person as being significant in their medication management and if they give informed written  
202 consent to participate.

203 Furthermore, a formal caregiver will be integrated into the investigation for each participant.

204 Professional caregivers are those employed to provide professional home health care services  
205 (i.e. nurses, nursing assistants, social assistant). They will be included in the study if the  
206 recruited OAMCC identifies them as the professional most involved in their medication  
207 management.

208 Table 1 presents the specific inclusion/exclusion criteria for each group of participants.

209 **Table 1. Inclusion and exclusion criteria of phase 2**

| Participants           | Inclusion criteria                                                                                                                                                                                                                                                                                                                                                                                                                                                          | Exclusion criteria                                                                          |
|------------------------|-----------------------------------------------------------------------------------------------------------------------------------------------------------------------------------------------------------------------------------------------------------------------------------------------------------------------------------------------------------------------------------------------------------------------------------------------------------------------------|---------------------------------------------------------------------------------------------|
| OAMCC                  | <ul style="list-style-type: none"> <li>- Aged 65 or above</li> <li>- Man or woman</li> <li>- Hospitalised within the last 90 days</li> <li>- Managing at least five different medications (prescribed and over-the-counter medications explored during recruitment)</li> <li>- Suffering from multiple chronic conditions</li> <li>- Living alone or in a couple, in a rural or urban area</li> <li>- With or without support from a Community Healthcare Centre</li> </ul> | <ul style="list-style-type: none"> <li>- Not able to speak and understand French</li> </ul> |
| Informal caregiver     | <ul style="list-style-type: none"> <li>- Designated by the OAMCC as the most significant informal caregiver involved in medication management</li> <li>- Aged 18 or above</li> </ul>                                                                                                                                                                                                                                                                                        | <ul style="list-style-type: none"> <li>- Not able to speak and understand French</li> </ul> |
| Professional caregiver | <ul style="list-style-type: none"> <li>- Designated by the OAMCC as having a key role in medication management</li> </ul>                                                                                                                                                                                                                                                                                                                                                   | <ul style="list-style-type: none"> <li>- Student</li> <li>- Apprentice</li> </ul>           |

210

### 211 ***Participant recruitment***

212 Polymedicated home-dwelling OAMCC will be recruited via two paths so that all of the  
213 participants meet the eligibility criteria and fit corresponding profiles established in the  
214 quantitative phase. Some OAMCC will be receivers of care from Community Healthcare  
215 Centres and others will be functioning without that day-to-day support:

216 - For OAMCC who do not receive support from a Community Healthcare Centre, recruitment  
217 will be based on variables in their patient files and carried out in collaboration with different  
218 nursing departments from the partner hospital;

219 - For OAMCC who do receive support from a Community Healthcare Centre, recruitment will  
220 be based on the clinical and health data documented in the RAI-HC and carried out in  
221 collaboration with community health care nurses from Sion Community Healthcare Centre.

1  
2  
3  
4 222 Research nurses partnering the project, from a hospital or a Community Healthcare Centre, will  
5 223 briefly explain the study to the patient. Potential participants will be asked for permission to  
6 224 give their name to the researchers. A member of the research team will contact the older adult  
7 225 by telephone during the week following hospital discharge and ask for their agreement to  
8 226 participate in the study. In case of agreement, a first meeting will be organised at the older  
9 227 adult's home in the next few days.

#### 15 228 ***Data Collection from OAMCC***

16 229 During the first home meeting with the OAMCC, the researcher will provide all the study details  
17 230 and will suggest two semi-structured interviews, each lasting about an hour, starting on the first  
18 231 meeting and spaced two to three weeks apart. The older adult will be invited to sign the  
19 232 informed written consent form, allowing the researcher to collect sociodemographic and health  
20 233 data (RAI-HC and the patient's hospital records). Eligible home-dwelling OAMCC from both  
21 234 recruitment paths will be screened using the RAI-HC Minimal Data Set (MDS), which includes  
22 235 information on polymedication (section P), multiple chronic conditions (sections J and K) and  
23 236 recent hospitalisation (section Ac). The research team will also carry out this evaluation for  
24 237 participants who do not have a RAI-HC. The following multidimensional clinical data will be  
25 238 retrieved from the RAI-HC MDS: cognitive status, hearing, vision, mood status, functional and  
26 239 physical status, continence, health care problems, and nutritional state.

27 240 The first semi-structured interview will collect the perspectives of OAMCC with regards to  
28 241 their medication management, the return home, information received about their treatment and  
29 242 its possible modifications, and the informal and professional caregivers involved. Each  
30 243 OAMCC will be interviewed alone. The researcher will then ask the participant to complete a  
31 244 week-long medication journal<sup>31 32</sup>, either alone or with the help from informal or professional  
32 245 caregivers, emphasising that any information on daily medication routines is helpful, even if  
33 246 the OAMCC feels unable to complete the journal for the full seven days. The instructions will  
34 247 mention the importance of noting all the medicines taken—those prescribed by general  
35 248 practitioners or specialist physicians, but also any others taken at their own initiative (over-the-  
36 249 counter medications). This will provide information on the daily routines associated with the  
37 250 participant's medication and will form the basis of the second interview.

38 251 The second interview will be based on the participant's medication journal and will take the  
39 252 form of a walking-interview<sup>33</sup> using household photographs.<sup>32</sup> The researcher will ask the  
40 253 participant to explain their medication practises while pointing out the locations within their  
41  
42  
43  
44  
45  
46  
47  
48  
49  
50  
51  
52  
53  
54  
55  
56  
57  
58  
59  
60

1  
2  
3  
4 254 home where drugs are stored, prepared and taken. The hypothesis underlying this methodology  
5 255 is that the physical presence of drugs promotes discussion.<sup>34 35</sup> We will identify and photograph,  
6 256 with the participants' agreement, the places where medication, contact details for medical  
7 257 professionals and other information are stored as well as the locations of any other objects  
8 258 involved in daily care practises. The collection and analysis of photographs provide a better  
9 259 understanding of the complexity of medication management in home settings. They help to  
10 260 capture the interviewee's concerns or strategies when they are pointed out to the interviewer.  
11 261 The interview guide will also investigate the issue of self-medication in order to reveal the  
12 262 extent and influence of this practice.

### 20 263 ***Data Collection from Informal Caregivers***

21 264 Sociodemographic data and information related to medication management will be collected.  
22 265 When possible and appropriate, a joint third interview<sup>36</sup> with the OAMCC and their principal  
23 266 informal caregiver<sup>31</sup> will be organised at the older adult's home one to two weeks after the  
24 267 walking interview. This type of interview provides access to the interactions between OAMCC  
25 268 and their informal caregivers with regards to medication management. We hypothesise that the  
26 269 main informal caregiver is deeply involved in the older adult's experience of medication  
27 270 management, but the caregiver's ideas about this may be similar to, overlapping with or  
28 271 different from those of an OAMCC.

### 36 272 ***Data Collection from Professional Caregivers***

37 273 A semi-structured interview of about one hour will be conducted with a professional caregiver  
38 274 in order to explore their point of view on the OAMCC's medication management and other  
39 275 issues associated with the return home after hospitalisation. This will take place at the  
40 276 professional's workplace (Community Healthcare Centre, medical practice office or pharmacy)  
41 277 one to two weeks after the interview with the OAMCC and their informal caregiver.

### 47 278 ***Qualitative data analyses***

48 279 A database will be prepared using the RedCap® software platform to record and store the  
49 280 participants' sociodemographic, health and interview data. Information on their health statuses  
50 281 will be collected using the RAI-HC data and will be analysed using the IBM-Statistical Package  
51 282 for Social Sciences (IBM-SPSS®), version 25.0.

52 283 Data collected via the interviews will be examined according to an analytical plan that integrates  
53 284 and compares two different methods. Firstly, thematic content analysis<sup>37 38</sup>, using NVivo 12®



1  
2  
3  
4 285 software, will be used to identify the themes emerging from the data, and this will provide a  
5  
6 286 rich, detailed account of the data set. Themes will be compared by different members of the  
7  
8 287 analysis team until a consensus is reached. Secondly, lexicometric analysis, using Iramuteq  
9  
10 288 software—a technique derived from the Alceste® method<sup>39</sup>—will allow a very fine exploration,  
11  
12 289 both within each interview and across the whole corpus of interviews, of the structures  
13  
14 290 underlying the discourse. Each older adult's medication journal will be analysed and  
15  
16 291 categorised according to the same principles as the interviews. The data collected from these  
17  
18 292 documents will be put into perspective by the analysis of the interviews. In the final data  
19  
20 293 analysis, links will be made between the interviews, the medication journal, the older adult's  
21  
22 294 RAI-HC data, and the photos of the medicines' locations.  
23  
24 295

### 296 **Ethics and Dissemination**

25 297 Ethical approval has been obtained from the Human Research Ethics Committee of the Canton  
26  
27 298 Vaud (CER-VD) (2018-02196). With this approval, the medical informatics department of  
28  
29 299 partner hospital will provide the appropriate data for the retrospective phase based on a data  
30  
31 300 extraction protocol. Extracted data will be delivered and stored in the ReDCap® data platform  
32  
33 301 via a secure coded data file. In coherence with the Data Management Plan submitted to the  
34  
35 302 Swiss National Science Foundation (NSF), the collected data will be securely stored for future  
36  
37 303 research.

38 304 The autonomy of the participants will be respected. Participation in the prospective phase in  
39  
40 305 this research is free. It will be possible for participants to refuse to record the interview or to  
41  
42 306 request the deletion of the recorded data. Participating in a structured effort to understand  
43  
44 307 medication practises and the post-hospital return home experience can contribute to  
45  
46 308 improvements in health management in the community at large, and particularly in the area of  
47  
48 309 home support.

49 310 Findings will be disseminated in peer-reviewed journals, professional conferences and other  
50  
51 311 knowledge transfer activities with primary healthcare providers, hospital care units, informal  
52  
53 312 caregiver and patient associations.  
54  
55 313

### 56 314 **Authors' contributions**

57 315 FP, PR and HV had the original idea. MSD, AVG, BW and HV provided conceptual and  
58  
59 316 methodological expertise to the design of the research protocol. FP, PR and HV were major  
60

1  
2  
3  
4 317 contributors to writing the manuscript. All authors read, edited and approved the final  
5  
6 318 manuscript.

7  
8 319

9 320 **Funding statement**

10  
11 321 This work is supported by the Swiss National Science Foundation grant number  
12  
13 322 407440\_183434/1.

14  
15 323

16 324 **Competing interest statement**

17  
18 325 None declared.

19  
20 326

21 327 **Word Count:** 3'657.



## 328 REFERENCES

1. Bachmann N, Burla L, Kohler D, et al. La santé en Suisse-Le point sur les maladies chroniques: Rapport national sur la santé . Retrieved from Berne: & Older people's experiences of medicine changes on leaving hospital. *Research in Social and Administrative Pharmacy* 2015;10:791-800.
2. Maher RL, Hanlon J, Hajjar ER. Clinical consequences of polypharmacy in elderly. *Expert Opinion on Drug Safety* 2014;13:57-65. doi: 10.1517/14740338.2013.827660
3. Masnoon N, Shakib S, Kalisch-Ellett L, et al. What is polypharmacy? A systematic review of definitions. *BMC Geriatrics* 2017;17:1-10. doi: 10.1186/s12877-017-0621-2
4. Monégat M, Sermet In collaboration with Marc Perronnin C, Rococo E. Polypharmacy: definitions, measurement and stakes involved. Review of the literature and measurement tests. 2014
5. Al Hamid A, Ghaleb M, Aljadhey H, et al. A systematic review of hospitalization resulting from medicine-related problems in adult patients. *British journal of clinical pharmacology* 2014;78:202-17. doi: 10.1111/bcp.12293
6. Renom-Guiteras A, Meyer G, Thürmann PA. The EU (7)-PIM list: a list of potentially inappropriate medications for older people consented by experts from seven European countries. *European journal of clinical pharmacology* 2015;71(7):861-75.
7. Nickel CH, Ruedinger JM, Messmer AS, et al. Drug - related emergency department visits by elderly patients presenting with non-specific complaints. *Scandinavian Journal of Trauma, Resuscitation and Emergency Medicine* 2013;21:15. doi: 10.1186/1757-7241-21-15
8. Fallis BA, Dhalla IA, Klemensberg J, et al. Primary medication non-adherence after discharge from a general internal medicine service. *PLoS ONE* 2013;8 doi: 10.1371/journal.pone.0061735
9. Bonnet-Zamponi D, d'Arailh L, Konrat C, et al. Drug-Related Readmissions to Medical Units of Older Adults Discharged from Acute Geriatric Units: Results of the Optimization of Medication in AGEd Multicenter Randomized Controlled Trial. *Journal of the American Geriatrics Society* 2013;61:113-21. doi: 10.1111/jgs.12037
10. Gilbert A, Roughead L, McDermott R, et al. Multiple Chronic Health Conditions in Older People: Implications for Health Policy Planning, Practitioners and Patients. University of South Australia 2013 [Ageing well ageing productively: people living with multiple chronic health conditions [1-48]. Available from: <https://www.unisa.edu.au/siteassets/episerver-6-files/global/health/sansom/documents/qumprc/multiple-chronic-health-conditions.pdf>.
11. Roughead EE, Vitry AI, Caughey GE, et al. Multimorbidity, care complexity and prescribing for the elderly. *Ageing Health* 2011;7:695-705. doi: 10.2217/ahe.11.64
12. O'Quin KE, Semalulu T, Orom H. Elder and caregiver solutions to improve medication adherence. *Health Education Research* 2015;30:323-35. doi: 10.1093/her/cyv009
13. Gillespie R, Mullan J, Harrison L. Managing medications: The role of informal caregivers of older adults and people living with dementia. A review of the literature. *Journal of Clinical Nursing* 2014;23:3296-308. doi: 10.1111/jocn.12519
14. Look KA, Stone JA. Medication management activities performed by informal caregivers of older adults. *Research in Social and Administrative Pharmacy* 2018;14:418-26. doi: 10.1016/j.sapharm.2017.05.005
15. Reinhard SC, Levine C, Samis S. Home alone: family caregivers providing complex chronic care. *Bmj* 2012;41. doi: 10.1136/bmj.39188.434630.59

- 1  
2  
3  
4 375 16. Pellegrin KL, Lee E, Uyeno R, et al. Potentially preventable medication-related  
5 376 hospitalizations: A clinical pharmacist approach to assessment, categorization, and  
6 377 quality improvement. *Journal of the American Pharmacists Association* 2017;57:711-  
7 378 16. doi: 10.1016/j.japh.2017.06.019
- 8  
9 379 17. Almanasreh E, Moles R, Chen TF. The medication reconciliation process and  
10 380 classification of discrepancies: a systematic review. *British journal of clinical*  
11 381 *pharmacology* 2016;82(3):645-58. doi: 10.1111/bcp.13017
- 12  
13 382 18. IHI. How-to guide: prevent adverse drug events by implementing medication  
14 383 reconciliation. Cambridge, MA: Institute for Healthcare Improvement, 2011.
- 15 384 19. Barnsteiner JH. Medication Reconciliation. In: Hughes RG, ed. Patient Safety and  
16 385 Quality: An Evidence-Based Handbook for Nurses. Rockville (MD)2008.
- 17 386 20. Creswell JW, Plano Clark VL. Improving medication management in home care: issues  
18 387 and solutions. 2011;155p. [published Online First: 2nd]
- 19 388 21. Vassar M, Holzmann M. The retrospective chart review: important methodological  
20 389 considerations. *Journal of Educational Evaluation for Health Professions* 2013;10:12.  
21 390 doi: 10.3352/jeehp.2013.10.12
- 22 391 22. A checklist for retrospective database studies - Report of the ISPOR Task Force on  
23 392 Retrospective Databases. *Value Health*; 2003.
- 24 393 23. Holzer B. SwissDRG – L'essentiel en bref. *Bulletin des médecins suisses* 2012;93:1079-  
25 394 81.
- 26 395 24. Classification Suisse des Interventions -Chirurgicales (CHOP); 2018.
- 27 396 25. Hubbard RE, Peel NM, Samanta M, et al. Derivation of a frailty index from the interRAI  
28 397 acute care instrument. *BMC Geriatrics* 2015;15:1-8. doi: 10.1186/s12877-015-0026-z
- 29 398 26. Roux P, Pereira F, Santiago-Delefosse M, et al. Medication practices and experiences of  
30 399 older adults discharged home from hospital: a feasibility study protocol. *Patient*  
31 400 *Preference and Adherence* 2018;Volume 12:1055-63. doi: 10.2147/PPA.S160990
- 32 401 27. Evans J, Jones P. The walking interview: Methodology, mobility and place. *Applied*  
33 402 *Geography* 2011;31:849-58.
- 34 403 28. Monod S, Büla C, Hongler T, et al. Le Resident Assessment Instrument-Home-Care  
35 404 (RAI-Domicile) : ce que le médecin de premier recours doit savoir. *Revue Médicale*  
36 405 *Suisse* 2011;7:2176-83.
- 37 406 29. Guest G, Bunce A, Johnson L. How Many Interviews Are Enough? *Field Methods*  
38 407 2006;18:59-82. doi: 10.1177/1525822X05279903
- 39 408 30. Vaud Éd. Commission consultative du soutien aux proches aidants | État de Vaud. *Site*  
40 409 *Officiel État de Vaud* 2018
- 41 410 31. Knight DA, Thompson D, Mathie E, et al. Seamless care? Just a list would have  
42 411 helped!'Older people and their carer's experiences of support with medication on  
43 412 discharge home from hospital. *Health Expectations* 2013;16:277-91. doi:  
44 413 10.1111/j.1369-7625.2011.00714.x
- 45 414 32. Dew K, Chamberlain K, Hodgetts D, et al. Home as a hybrid centre of medication  
46 415 practice. *Sociology of health illness* 2014;36:28-43.
- 47 416 33. Carpiano RM. Come take a walk with me: The "Go-Along" interview as a novel method  
48 417 for studying the implications of place for health and well-being. *Health place*  
49 418 2009;15:263-72.
- 50 419 34. Fainzang S. Les médicaments dans l'espace privé. *Anthropologie et Sociétés* 2003;27:139.  
51 420 doi: 10.7202/007450ar

- 1  
2  
3  
4 421 35. Haxaire C. « Calmer les nerfs » : automédication, observance et dépendance à l'égard des  
5 422 médicaments psychotropes. *Sciences sociales et santé* 2002;20:63-88. doi:  
6 423 10.3406/sosan.2002.1545  
7  
8 424 36. Polak L, Green J. Using Joint Interviews to Add Analytic Value. *Qualitative Health*  
9 425 *Research* 2016;26:1638-48. doi: 10.1177/1049732315580103  
10 426 37. Braun V, Clarke V. Qualitative Research in Psychology Using thematic analysis in  
11 427 psychology Using thematic analysis in psychology. *Qualitative Research in*  
12 428 *Psychology* 2006;3:77-101. doi: 10.1191/1478088706qp063oa  
13 429 38. Elo S, Kyngäs H. The qualitative content analysis process. *Journal of Advanced Nursing*  
14 430 2008;62:107-15. doi: 10.1111/j.1365-2648.2007.04569.x  
15 431 39. Ratinaud P, Déjean S. IRaMuTeQ: implémentation de la méthode ALCESTE d'analyse de  
16 432 texte dans un logiciel libre. *Modélisation Appliquée aux Sciences Humaines et*  
17 433 *Sociales MASHS* 2009:8-9.  
18  
19  
20 434

# BMJ Open

## Protocol for a mixed-methods study to optimise medication management for polymedicated home-dwelling older adults with multiple chronic conditions

|                                 |                                                                                                                                                                                                                                                                                                                                                                                                                                                                                                                                                                                                                                                                                 |
|---------------------------------|---------------------------------------------------------------------------------------------------------------------------------------------------------------------------------------------------------------------------------------------------------------------------------------------------------------------------------------------------------------------------------------------------------------------------------------------------------------------------------------------------------------------------------------------------------------------------------------------------------------------------------------------------------------------------------|
| Journal:                        | <i>BMJ Open</i>                                                                                                                                                                                                                                                                                                                                                                                                                                                                                                                                                                                                                                                                 |
| Manuscript ID                   | bmjopen-2019-030030.R1                                                                                                                                                                                                                                                                                                                                                                                                                                                                                                                                                                                                                                                          |
| Article Type:                   | Protocol                                                                                                                                                                                                                                                                                                                                                                                                                                                                                                                                                                                                                                                                        |
| Date Submitted by the Author:   | 17-Aug-2019                                                                                                                                                                                                                                                                                                                                                                                                                                                                                                                                                                                                                                                                     |
| Complete List of Authors:       | Pereira, Filipa; School of Health Sciences, HES-SO Valais-Wallis, Sion, Switzerland<br>Roux, Pauline; University of Lausanne, Research Center for Psychology of Health, Aging and Sport Examination<br>Delefosse, Marie; University of Lausanne, Research Center for Psychology of Health, Aging and Sport Examination<br>Von-Gunten, Armin; Service of Old Age Psychiatry, Lausanne University Hospital<br>Wernli, Boris; FORS, Swiss Centre of Expertise in the Social Sciences, University of Lausanne<br>Martins, Maria Manuela; Higher School of Nursing of Porto - City of Porto Unit<br>Verloo, Henk; School of Health Sciences, HES-SO Valais-Wallis, Sion, Switzerland |
| <b>Primary Subject Heading</b>: | Geriatric medicine                                                                                                                                                                                                                                                                                                                                                                                                                                                                                                                                                                                                                                                              |
| Secondary Subject Heading:      | Pharmacology and therapeutics, Patient-centred medicine, Nursing, Evidence based practice                                                                                                                                                                                                                                                                                                                                                                                                                                                                                                                                                                                       |
| Keywords:                       | Health & safety < HEALTH SERVICES ADMINISTRATION & MANAGEMENT, PREVENTIVE MEDICINE, PRIMARY CARE, Adverse events < THERAPEUTICS                                                                                                                                                                                                                                                                                                                                                                                                                                                                                                                                                 |
|                                 |                                                                                                                                                                                                                                                                                                                                                                                                                                                                                                                                                                                                                                                                                 |

SCHOLARONE™  
Manuscripts

1  
2  
3 **Protocol for a mixed-methods study to optimise medication management for**  
4 **polymedicated home-dwelling older adults with multiple chronic conditions**  
5  
6  
7

---

8 Filipa PEREIRA (1), Pauline ROUX (2), Marie SANTIAGO-DELEFOSSE (3), Armin VON  
9 GUNTEN (4), Boris WERNLI (5), Maria Manuela MARTINS (6), Henk VERLOO (7)  
10  
11  
12  
13  
14

15 **Principal and Corresponding author**

16 **(1)** PhD(c), Scientific Collaborator

17 School of Health Sciences

18 HES-SO University of Applied Sciences and Arts Western Switzerland

19 5, Chemin de l'Agasse

20 CH-1950 Sion, Switzerland

21 Email: [filipa.pereira@hevs.ch](mailto:filipa.pereira@hevs.ch); Phone: +41 78 666 17 00; Fax: +41 27 606 84 00  
22  
23  
24  
25  
26  
27  
28

29 **Co-author**

30 **(2)** PhD, Junior Lecturer

31 University of Lausanne, Research Center for Psychology of Health, Aging and Sport  
32 Examination  
33

34 Quartier UNIL-Mouline

35 Bâtiment Géopolis

36 CH-1015 Lausanne, Switzerland

37 Email: [pauline.roux@unil.ch](mailto:pauline.roux@unil.ch); Phone: +41 21 692 32 56  
38  
39  
40  
41  
42  
43  
44

45 **Co-author**

46 **(3)** PhD, Full Professor

47 University of Lausanne, Research Center for Psychology of Health, Aging and Sport  
48 Examination  
49

50 Quartier UNIL-Mouline

51 Bâtiment Géopolis

52 CH-1015 Lausanne, Switzerland

53 Email: [marie.santiago@unil.ch](mailto:marie.santiago@unil.ch)  
54  
55  
56  
57  
58  
59  
60

**Co-author**

(4) MD, Full Professor

Service of Old Age Psychiatry, Lausanne University Hospital

Email: [armin.von-gunten@chuv.ch](mailto:armin.von-gunten@chuv.ch); Phone: +41 21 314 27 95

**Co-author**

(5) PhD, Full Professor

FORS, Swiss Centre of Expertise in the Social Sciences, University of Lausanne, Expert in  
Database Processing

Email: [boris.wernli@fors.unil.ch](mailto:boris.wernli@fors.unil.ch); Phone: +41 21 692 37 23

**Co-author**

(6) PhD, Full Professor

Higher School of Nursing of Porto

Institute of Biomedical Sciences Abel Salazar, University of Porto

Rua Dr. António Bernardino de Almeida

4200-072 Porto, Portugal

Email: [mmartins@esenf.pt](mailto:mmartins@esenf.pt); Phone: +351 22 507 35 00

**Co-author**

(7) PhD, Full Professor

School of Health Sciences

HES-SO University of Applied Sciences and Arts Western Switzerland

5, Chemin de l'Agasse

CH-1951 Sion, Switzerland

Email: [henk.verloo@hevs.ch](mailto:henk.verloo@hevs.ch); Phone: +41 27 606 84 34

## 1 **ABSTRACT**

### 2 **Introduction:**

3 Optimal medication management is one of the basic conditions necessary for home-dwelling  
4 older adults living with multiple chronic conditions (OAMCC) to be able to remain at home  
5 and preserve their quality of life. Currently, the reasons for such high numbers of emergency  
6 department visits and the very significant rate of hospitalisations for OAMCC, due to  
7 medication-related problems (MRPs), is poorly explored. This study aims to reveal the current  
8 state of the medication management practices of polymedicated, home-dwelling OAMCC and  
9 to make proposals for improving clinical and medication pathways through an innovative and  
10 integrated model for supporting medication management and preventing adverse health  
11 outcomes.

12 **Methods and analysis:** A mixed-methods study will address the medication management of  
13 polymedicated, home-dwelling OAMCC. Its explanatory sequential design will involve two  
14 major phases conducted sequentially over time. The quantitative phase will consist of  
15 retrospectively exploiting the last five years of electronic patient records from a local hospital  
16 ( $N \approx 50,000$ ) in order to identify the different profiles—made up of patient-, medication- and  
17 environment-related factors—of the polymedicated, home-dwelling OAMCC at risk of  
18 hospitalisation, emergency department visits, hospital readmission (notably for MRPs),  
19 institutionalisation or early death. The qualitative study will involve: a) obtaining and  
20 understanding the medication management practices and experiences of the identified profiles  
21 extracted from the hospital data of OAMCC who will be interviewed at home ( $N \approx 30$ ); b)  
22 collecting and analysing the perspectives of the formal and informal caregivers involved in  
23 medication management at home in order to cross-reference perspectives about this important  
24 dimension of care at home. Finally, the mixed-methods findings will enable the development  
25 of an innovative, integrated model of medication management based on the Agency for Clinical  
26 Innovation framework and Bodenheimer & Sinsky's quadruple aim.

27 **Ethics and dissemination:** Ethical approval has been obtained from the Human Research  
28 Ethics Committee of the Canton Vaud (2018-02196). Findings will be disseminated in peer-  
29 reviewed journals, professional conferences and other knowledge transfer activities with  
30 primary healthcare providers, hospital care units, informal caregivers' and patients'  
31 associations.

32



1  
2  
3  
4 33 **Keywords**

5  
6 34 Polymedication, home-dwelling older adults, multiple chronic conditions, medication  
7  
8 35 management, mixed-methods research, protocol, medication-related problems, hospitalisation,  
9  
10 36 retrospective review

11 37  
12  
13 38 **Study strengths and limitations**

- 14  
15 39 • This mixed methodology will rely on a closely coordinated combination of methods and  
16  
17 40 on the utilisation of valuable existing data under-exploited to date (patients' electronic  
18  
19 41 hospital records and Resident Assessment Instrument-Home Care (RAI-HC) data).
- 20 42 • The investigation draws upon an interprofessional and interdisciplinary approach,  
21  
22 43 which associates general practitioners, community health care nurses, pharmacists and  
23  
24 44 researchers in health psychology, old age psychiatry, nursing and survey methodology.
- 25 45 • Our findings will contribute to the development of an evidence-based and innovative,  
26  
27 46 cooperative model of medication management for polymedicated, home-dwelling older  
28  
29 47 adults with multiple chronic conditions.
- 30 48 • Although patients' electronic hospital records and RAI-HC data provide a broad range  
31  
32 49 of patient-, medication- and environment-related information, they rarely highlight  
33  
34 50 factors that may influence the occurrence of MRPs.
- 35  
36  
37  
38  
39  
40  
41  
42  
43  
44  
45  
46  
47  
48  
49  
50  
51  
52  
53  
54  
55  
56  
57  
58  
59  
60



## 51 INTRODUCTION

52 The number of older adults living at home with multiple chronic conditions (OAMCC) rises  
53 considerably around the world and has been estimated to affect 25.2% of people aged from 65  
54 to 79 and 41.3% of those aged 80 and over.<sup>1</sup> Multiple chronic conditions is a comprehensive  
55 concept used to properly cover the diverse definitions of multi-morbidity<sup>2 3</sup> and therefore the  
56 complexity of older adults' health statuses. The concept encompasses the simultaneous presence  
57 of an individual's diseases and their chronic physical, mental or behavioural health problems  
58 requiring ongoing management over years or decades.<sup>4</sup>

59 These long-term health conditions require taking multiple medications<sup>5</sup>, known as  
60 polypharmacy (PP) when the daily intake corresponds to five or more medicines.<sup>6</sup>  
61 Polypharmacy places older adults at higher risk of medication-related problems (MRPs),  
62 including adverse medication reactions, medication errors and potentially inappropriate  
63 medications.<sup>7 8</sup> Potentially inappropriate medications are the intake of medicines for which the  
64 associated risks outweigh the potential benefits, particularly when more effective alternatives  
65 are available.<sup>9</sup> Consequently, MRPs can lead to a degradation of the patient's clinical condition,  
66 physical and cognitive decline, an exacerbation of chronic medical conditions and avoidable  
67 health costs.<sup>10 11</sup> Moreover, up to 25% of emergency department visits by home-dwelling  
68 OAMCC are due to MRPs.<sup>10</sup> However, 60% of MRPs in patients visiting the emergency  
69 department with non-specific complaints (such as weakness) may go undiagnosed, whereas  
70 83% of those MRPs may be responsible for acute morbidity.<sup>10</sup> MRPs are also a frequent cause  
71 of readmission, and they were the most frequent cause in one study that followed older patients  
72 for six months after hospital discharge.<sup>12</sup> Care-coordination problems, associated with low or  
73 suboptimal medication management, are all the more evident in the sensitive period of  
74 discharge home from hospital.<sup>11 13</sup> The complexity of OAMCC' care needs leads them to be  
75 significant users of health services and to consult many different health care professionals.<sup>14</sup>  
76 The number of health care professionals consulted by home-dwelling OAMCC has been  
77 directly associated with fragmented and uncoordinated care.<sup>13</sup> Moreover, different health care  
78 professionals may have different treatment preferences. Failure to coordinate care among  
79 home-dwelling OAMCC contributes to MRPs.<sup>13</sup>

80 In addition to role of health care professionals in medication management, informal caregivers  
81 play a vital role in ensuring safe and appropriate medication use by home-dwelling OAMCC,  
82 especially among those who may also have cognitive impairment.<sup>15-17</sup> Despite the important

1  
2  
3  
4 83 role of informal caregivers in medication management, several complications to do with their  
5 84 activities have been documented in relation to the time spent, anxiety making a mistake and the  
6 85 uncooperative behaviour of the home-dwelling OAMCC.<sup>18</sup> They are also confronted with  
7 86 difficulties in maintaining continuous supplies of medication, assisting with administration,  
8 87 making clinical judgements (e.g. in response to side effects and about over-the-counter  
9 88 medication), and solving conflictual communications or disagreements with the older adult<sup>18</sup>,  
10 89 or even with health care professionals, with regards to ineffective and addictive medication  
11 90 practices.<sup>15 18</sup>

12 91 Nonetheless, many MRPs are preventable.<sup>8 10 19</sup> Studies about medicine-related hospitalisations  
13 92 suggest that up to 58% may be preventable with appropriate primary care.<sup>8</sup> An essential strategy  
14 93 for medicine-related hospitalisations prevention and medication safety is medication  
15 94 reconciliation - the process of creating and maintaining a single list of the patient's current list  
16 95 of medications.<sup>20</sup> This process allows a systematic and comprehensive review of all the  
17 96 medications the patient is taking, reducing medication errors by a consistent communication  
18 97 across transitions of care.<sup>21</sup>

19 98 Therefore, optimising medication management among home-dwelling OAMCC requires  
20 99 regular monitoring of MRPs, interprofessional collaboration across different health and social  
21 100 care providers, organisations and departments<sup>13</sup> and medication reconciliation at every  
22 101 transition of care including changes in the clinical setting, practitioner, or level of care.<sup>22</sup>

## 102 **Aim and Objectives**

103 The study aim is to document the current state of medication management practices of  
104 polymedicated, home-dwelling OAMCC and to make proposals for improving evidence-based  
105 clinical and medication pathways through an innovative, integrated model intended to support  
106 medication management and to prevent adverse health outcomes related to MRPs (recurrent  
107 hospitalisation, emergency department visits, institutionalisation in nursing homes and early  
108 death). To achieve this aim, three main objectives will guide this project:

109 The first objective is to carry out a **retrospective analysis of patients' hospital records**, their  
110 medication and environment-related factors in order to identify those that increase the risk of  
111 hospitalisation, emergency department visits, hospital readmission (notably due to MRPs),  
112 institutionalisation or early death, among home-dwelling polymedicated OAMCC—factors that  
113 prevent OAMCC from staying at home.

1  
2  
3  
4 114 The second objective is to use a **prospective qualitative study** to explore and better understand  
5  
6 115 **the medication experiences and practices of home-dwelling OAMCC with different**  
7  
8 116 **profiles**. We seek to identify the skills and strategies developed by them to manage  
9  
10 117 polymedication within their social contexts and health trajectories despite possible cognitive  
11  
12 118 impairment and particularly after a recent hospitalisation.

13 119 The third objective is to better understand the **roles and coordination of the different**  
14  
15 120 **caregivers involved in the medication management of home-dwelling OAMCC**. We seek  
16  
17 121 to investigate the perspectives of both professional caregivers (community health care nurses,  
18  
19 122 pharmacists, general practitioners or specialist physicians) and non-professional/informal  
20  
21 123 caregivers (family members, friends or neighbours).

## 22 124 **METHODS**

### 23 125 **Study design**

24  
25  
26  
27 126 To enable us to meet our objectives, a mixed-methods study will address the medication  
28  
29 127 management of polymedicated, home-dwelling OAMCC.<sup>23</sup> Two major phases will be  
30  
31 128 conducted sequentially from February 2019 to January 2022: a quantitative data collection  
32  
33 129 phase followed by a qualitative phase. The reasons for using an explanatory sequential design  
34  
35 130 are, firstly, that existing data in electronic patient records from a local hospital will enable us  
36  
37 131 to identify profiles affected by similar patient-, medication- and environment-related factors  
38  
39 132 among the polymedicated, home-dwelling OAMCC at risk of hospitalisation, emergency  
40  
41 133 department visits, hospital readmission (notably due to MRPs), institutionalisation, or early  
42  
43 134 death. Secondly, the identified profiles extracted from the hospital data will allow proceeding  
44  
45 135 to a purposive sampling—of those polymedicated, home-dwelling OAMCC who present with  
46  
47 136 more risk factors—for the qualitative data collection focused on medication management at  
48  
49 137 home. Thus, the analysis of the results from the retrospective quantitative phase will be  
50  
51 138 integrated with the data collected from the prospective qualitative phase. Finally, phase 3 will  
52  
53 139 develop a Medication Management Model based on interpreting the quantitative and qualitative  
54  
55 140 findings.

### 53 141 **Phase 1, Retrospective Quantitative Analysis**

54  
55  
56 142 To fulfil the first objective, the purpose of the quantitative phase is to identify the different  
57  
58 143 profiles—made up of patient-, medication- and environment-related factors—of the  
59  
60 144 polymedicated, home-dwelling OAMCC at risk of hospitalisation, emergency department

1  
2  
3  
4 145 visits, hospital readmission (notably for MRPs), institutionalisation in nursing homes, or early  
5  
6 146 death (before the average age of death described by the Organisation for Economic Co-  
7  
8 147 operation and Development in 2018).<sup>24</sup> A systematic, retrospective chart analysis of the  
9  
10 148 electronic patient records from a local hospital over the last four years using the evidence-based  
11  
12 149 methodology developed by Vassar & Holzmann will provide substantial clinical information.<sup>25</sup>  
13  
14 150 Motheral et al.'s standardised extraction sheets will be adapted to explore and assess the data  
15  
16 151 of older inpatients or emergency department-visiting home-dwelling older adults.<sup>26</sup> The four-  
17  
18 152 year analysis was selected based on the availability of systematic, well-coded patient data using  
19  
20 153 the Swiss-Diagnostic Related Groups (DRG)<sup>27</sup> and the Swiss Classification of Surgical  
21  
22 154 Interventions (CHOP).<sup>28</sup>

### 22 155 ***Research population***

23  
24 156 All home-dwelling OAMCC with somatic and/or mental health disorders who were  
25  
26 157 hospitalised, rehospitalised or who consulted the emergency department (for MRPs or other  
27  
28 158 reasons) at the partner hospital between 2015 and 2018 (estimated N = 50,000) will be included.  
29  
30 159 The estimated sample of 50,000 older adults' electronic inpatient charts are part of the 40,000  
31  
32 160 yearly adult inpatients in acute care units and more than 40,000 adult emergency department  
33  
34 161 consultations yearly at the partner hospital. To explore generalisability, we will compare their  
35  
36 162 sociodemographic and health status characteristics with those of the national sample of  
37  
38 163 hospitalised older adults in Swiss hospitals for the same period.

### 38 164 ***Data Collection***

39  
40 165 Data from the hospitalisation and emergency admissions databases will be collected on patient-,  
41  
42 166 medication- and environment-related factors that could have influenced the occurrence of  
43  
44 167 MRPs that resulted in hospitalisation, rehospitalisation or emergency department admission.  
45  
46 168 Patient-related factors comprise sociodemographic characteristics, the International  
47  
48 169 Classification of Diseases 10th version (ICD-10) diagnostics (main diagnosis and co-  
49  
50 170 morbidities), the Swiss Classification of Surgical Interventions (CHOP) category and the reason  
51  
52 171 for hospitalisation, rehospitalisation or emergency department admission. Supplementary filters  
53  
54 172 will be added to discriminate polymedication, multi-morbidity (secondary ICD-10 diagnosis),  
55  
56 173 physical and cognitive impairment documented in the clinical data files (Function  
57  
58 174 Independence Measure, Mini-Mental State Examination, and Activities of Daily Living).  
59  
60 175 Medication-related factors include the number, types and changes in medication at admission,  
60 176 during hospitalisation and at discharge.

1  
2  
3  
4 177 Environment-related factors include the presence of formal and/or informal caregivers, patient's  
5 178 provenance (rural or urban), hospital pathways (wards and eventual transfers), length of stay,  
6 179 readmissions (number of admissions in the previous year, 30-day readmission and unplanned  
7 180 readmission), discharge destination and, potentially, death during hospitalisation. A unique  
8 181 patient identification number will allow us to analyse re-hospitalisations via the emergency  
9 182 department during the period from 2015 to 2018. Retrospective data collection began in April  
10 183 2019.

#### 17 184 ***Data Analyses***

18 185 The dataset of polymedicated, home-dwelling OAMCC will be analysed using multivariate  
19 186 regression analysis, in order to identify the patient-, medication- and environment-related  
20 187 factors that can increase the risk of hospitalisation, emergency department visits, readmission  
21 188 (notably due to MRPs), institutionalisation or early death. Furthermore, the profiles of  
22 189 polymedicated, home-dwelling OAMCC hospitalised or visiting the emergency department due  
23 190 to MRPs, and identified via multi-cluster analysis, will serve to guide the qualitative study and  
24 191 lead to a purposive sampling of polymedicated, home-dwelling OAMCC presenting with more  
25 192 risk factors. A draft of the cluster analysis strategy is available as a supplementary file.

#### 34 194 **Phase 2, Prospective Patient-Centred Qualitative Analysis**

35 195 To meet the second and third objectives, a qualitative investigation, based on purposive  
36 196 sampling, will draw upon work done in a feasibility study.<sup>29</sup> This qualitative investigation will  
37 197 consist of collecting and understanding the medication practices and experiences of OAMCC  
38 198 presenting with the risk factors identified in the first phase. The focus will be on identified  
39 199 OAMCC who were recently hospitalised and are at risk of hospital readmission. The older adult  
40 200 will be interviewed at home on two separate occasions. This methodology is a way to analyse  
41 201 changes in their medication practises and their experiences following their recent  
42 202 hospitalisation. The data collection tools include a walking-interview<sup>30</sup> based on a medication  
43 203 journal and household photographs of where medication is stored. This allows us to focus on  
44 204 the tangible practices of OAMCC and contextualises them within the private space of their daily  
45 205 lives.

46 206 To discriminate the older adults' health profile, we will use the Resident Assessment Instrument  
47 207 –Home-Care (RAI-HC) introduced by the Swiss Association for Home Care Services for all

1  
2  
3  
4 208 home care services in 2004. Based on a comprehensive geriatric assessment, the RAI-HC not  
5  
6 209 only allows for the establishment of an individualised care plan, but it also generates quality  
7  
8 210 indicators, plans resource use, optimises the medication management process by monitoring  
9  
10 211 and documenting the number and types of medication and the persons involved in preparing  
11  
12 212 medication, and regularly assesses adherence to the medication prescribed.<sup>31</sup> This instrument  
13  
14 213 will provide information on the patient-, medication- and environment-related factors which  
15  
16 214 may influence the occurrence of MRPs, and it will be used to recruit OAMCC at risk of or  
17  
18 215 already presenting with MRPs.

18 216 Furthermore, we will also collect and analyse the perspectives of the formal and informal  
19  
20 217 caregivers involved in medication management at home, to cross-reference perspectives about  
21  
22 218 this important dimension of care at home.

### 23 24 219 ***Research population***

25  
26 220 The profiles of the polymedicated OAMCC hospitalised/rehospitalised or consulting the  
27  
28 221 emergency department, as identified in the retrospective investigation, will be used to select  
29  
30 222 participants for the qualitative investigation. A theoretical, purposive sampling will be carried  
31  
32 223 out. Based on Guest et al., the principal investigator will recruit about 30 polymedicated  
33  
34 224 OAMCC (until saturation of data), all recently hospitalised (within the last 90 days) and at risk  
35  
36 225 of hospital readmission.<sup>32</sup> For each OAMCC participant, an informal caregiver will also be  
37  
38 226 integrated into the investigation. We defined informal caregivers as any family member,  
39  
40 227 neighbour or friend assisting a dependent older adult with certain activities in their daily life.  
41  
42 228 That assistance, help, care or physical presence must be given on a regular basis, for at least  
43  
44 229 two basic activities or instrumental activities of daily living or to ensure patient safety, and for  
45  
46 230 six months or more.<sup>33</sup> The informal caregiver will be included in the study if the recruited older  
47  
48 231 adult identifies that person as being significant in their medication management and if they give  
49  
50 232 informed written consent to participate.

51  
52 233 Furthermore, a formal caregiver will be integrated into the investigation for each participant.  
53  
54 234 Professional caregivers are those employed to provide professional health care services (i.e.  
55  
56 235 nurses, nursing assistants, general practitioners, pharmacists, social workers). They will be  
57  
58 236 included in the study if the recruited OAMCC identifies them as the professional most involved  
59  
60 237 in their medication management.

57 238 Table 1 presents the specific inclusion/exclusion criteria for each group of participants.

59 239



240

**Table 1. Phase 2 inclusion and exclusion criteria**

| Participants           | Inclusion criteria                                                                                                                                                                                                                                                                                                                                                                                                                                                                      | Exclusion criteria                                                                          |
|------------------------|-----------------------------------------------------------------------------------------------------------------------------------------------------------------------------------------------------------------------------------------------------------------------------------------------------------------------------------------------------------------------------------------------------------------------------------------------------------------------------------------|---------------------------------------------------------------------------------------------|
| OAMCC                  | <ul style="list-style-type: none"> <li>- Aged 65 or above</li> <li>- Man or woman</li> <li>- Hospitalised within the last 90 days</li> <li>- Managing at least five different medications (prescribed and over-the-counter medications explored during recruitment)</li> <li>- Suffering from multiple chronic conditions<sup>4</sup></li> <li>- Living alone or in a couple, in a rural or urban area</li> <li>- With or without support from a Community Healthcare Centre</li> </ul> | <ul style="list-style-type: none"> <li>- Not able to speak and understand French</li> </ul> |
| Informal caregiver     | <ul style="list-style-type: none"> <li>- Designated by the OAMCC as the most significant informal caregiver involved in medication management</li> <li>- Aged 18 or above</li> </ul>                                                                                                                                                                                                                                                                                                    | <ul style="list-style-type: none"> <li>- Not able to speak and understand French</li> </ul> |
| Professional caregiver | <ul style="list-style-type: none"> <li>- Designated by the OAMCC as having a key role in medication management</li> </ul>                                                                                                                                                                                                                                                                                                                                                               | <ul style="list-style-type: none"> <li>- Student</li> <li>- Apprentice</li> </ul>           |

241

**Participant recruitment**

Polymedicated, home-dwelling OAMCC will be recruited via two paths so that all of the participants meet the eligibility criteria and fit corresponding profiles established in the quantitative phase. Some OAMCC will be receivers of care from Community Healthcare Centres and others will be functioning without that day-to-day support:

- For OAMCC who do not receive support from a Community Healthcare Centre, recruitment will be based on variables in their patient files and carried out in collaboration with different nursing departments from the partner hospital;

- For OAMCC who do receive support from a Community Healthcare Centre, recruitment will be based on the clinical and health data documented in the RAI-HC and carried out in collaboration with community health care nurses from Sion Community Healthcare Centre.

Research nurses partnering the project, from a hospital or a Community Healthcare Centre, will briefly explain the study to the patient. Potential participants will be asked for permission to give their name to the researchers. The principal investigator will contact the older adult by telephone during the week following hospital discharge and ask for their agreement to participate in the study. In case of agreement, a first meeting will be organised at the older adult's home in the next few days. Participant recruitment will start in October 2019.

259

260

### 261 ***Data Collection from OAMCC***

262 During the first home meeting with the OAMCC, the principal investigator will provide all the  
263 study details and will suggest two semi-structured interviews, each lasting about an hour,  
264 starting on the first meeting and spaced two to three weeks apart. According to participants'  
265 levels of tiredness, it may be necessary to subdivide the interviews. The older adult will be  
266 invited to sign the informed written consent form, allowing the researcher to collect  
267 sociodemographic and health data (RAI-HC and the patient's hospital records). Eligible home-  
268 dwelling OAMCC from both recruitment paths will be screened using the RAI-HC Minimal  
269 Data Set (MDS), which includes information on polymedication (section P), multiple chronic  
270 conditions (sections J and K) and recent hospitalisation (section Ac). Research team members  
271 trained on the RAI-HC will also carry out this evaluation for participants who do not have an  
272 RAI-HC. The following multidimensional clinical data will be retrieved from the RAI-HC  
273 MDS: cognitive status, hearing, vision, mood status, functional and physical status, continence,  
274 health care problems, and nutritional state. The MDS will aid interviews with OAMCC and the  
275 exploration of the facilitators and barriers to daily medication management.

276 The first semi-structured interview will collect the perspectives of OAMCC with regards to  
277 their medication management, the return home, information received about their treatment and  
278 its possible modifications, whether their opinions and preferences were taken into account in  
279 the prescription of medications, and the informal and professional caregivers involved.  
280 OAMCCs will be interviewed alone or with an informal caregiver, if necessary. The principal  
281 investigator will then ask the participant to complete a week-long medication journal<sup>34 35</sup>, either  
282 alone or with the help from informal or professional caregivers, emphasising that any  
283 information on daily medication routines is helpful, even if the OAMCC feels unable to  
284 complete the journal for the full seven days. The instructions will mention the importance of  
285 noting all the medicines taken—those prescribed by general practitioners or specialist  
286 physicians, but also any others taken at their own initiative (over-the-counter medications).  
287 Participants will be asked to note their perceptions of and satisfaction with their treatment in a  
288 week-long medication journal. This will provide information on the daily routines associated  
289 with the participant's medication and will form the basis of the second interview.

290 The second interview will be based on the participant's medication journal and will take the  
291 form of a walking-interview<sup>36</sup> using household photographs.<sup>35</sup> The principal investigator will  
292 ask the participant to explain their medication practises while pointing out the locations within



1  
2  
3  
4 293 their home where drugs are stored, prepared and taken. The hypothesis underlying this  
5  
6 294 methodology is that the physical presence of drugs promotes discussion.<sup>37 38</sup> We will identify  
7  
8 295 and photograph, with the participants' agreement, the places where medication, contact details  
9  
10 296 for medical professionals and other information are stored as well as the locations of any other  
11  
12 297 objects involved in daily care practises. The collection and analysis of photographs provide a  
13  
14 298 better understanding of the complexity of medication management in home settings. They help  
15  
16 299 to capture the interviewee's concerns or strategies when they are pointed out to the interviewer.  
17  
18 300 The interview guide will also investigate the issue of self-medication in order to reveal the  
19  
20 301 extent and influence of this practice.

### 21 302 ***Data Collection from Informal Caregivers***

22 303 Sociodemographic data and information related to medication management will be collected.  
23  
24 304 When possible and appropriate, a joint third interview<sup>39</sup> with the OAMCC and their principal  
25  
26 305 informal caregiver<sup>34</sup> will be organised at the older adult's home one to two weeks after the  
27  
28 306 walking interview. This type of interview provides access to the interactions between OAMCC  
29  
30 307 and their informal caregivers with regards to medication management. We hypothesise that the  
31  
32 308 main informal caregiver is deeply involved in the older adult's experience of medication  
33  
34 309 management, but the caregiver's ideas about this may be similar to, overlapping with or  
35  
36 310 different from those of an OAMCC.

### 37 311 ***Data Collection from Professional Caregivers***

38 312 A semi-structured interview of about one hour will be conducted with a professional caregiver  
39  
40 313 in order to explore their point of view on the OAMCC's medication management and other  
41  
42 314 issues associated with the return home after hospitalisation. In agreement with the project's  
43  
44 315 field partners and stakeholders, these interviews will take place in professionals' workplaces  
45  
46 316 (Community Healthcare Centre, medical practice office or pharmacy), during working hours,  
47  
48 317 one to two weeks after the interview with the OAMCC and their informal caregiver.

### 49 318 ***Qualitative data analyses***

50 319 A database will be prepared using the RedCap® software platform to record and store the  
51  
52 320 participants' sociodemographic, health and interview data. Information on their health statuses  
53  
54 321 will be collected using the RAI-HC data and will be analysed using the IBM-Statistical Package  
55  
56 322 for Social Sciences (IBM-SPSS®), version 25.0.

1  
2  
3  
4 323 Data collected via the interviews will be examined according to an analytical plan that integrates  
5  
6 324 and compares two different methods. Firstly, thematic content analysis<sup>40 41</sup>, using NVivo 12®  
7  
8 325 software, will be used to identify the themes emerging from the data, and this will provide a  
9  
10 326 rich, detailed account of the data set. Themes will be compared by different members of the  
11  
12 327 analysis team until a consensus is reached. Secondly, lexicometric analysis, using Iramuteq  
13  
14 328 software—a technique derived from the Alceste® method<sup>42</sup>—will allow a very fine exploration,  
15  
16 329 both within each interview and across the whole corpus of interviews, of the structures  
17  
18 330 underlying the discourse. Each older adult’s medication journal will be analysed and  
19  
20 331 categorised according to the same principles as the interviews. The data collected from these  
21  
22 332 documents will be put into perspective by the analysis of the interviews. In the final data  
23  
24 333 analysis, links will be made between the interviews, the medication journal, the older adult’s  
25  
26 334 RAI-HC data, and the photos of the medicines’ locations.  
27  
28 335

### 336 **Phase 3, Development of a Medication Management Model**

28 337 Connecting retrospective and prospective findings, using an explanatory sequential design and  
29  
30 338 participants’ different perspectives, will contribute to a deep understanding of the current state  
31  
32 339 of medication management practices of polymedicated, home-dwelling OAMCC. This mixed-  
33  
34 340 methods study corresponds to the “diagnostic” phase of the process of developing a Model of  
35  
36 341 Care, as presented by the Agency for Clinical Innovation (ACI).<sup>43</sup> It will guide the “solution  
37  
38 342 design” phase—the next step in the creation of an innovative, integrated model for supporting  
39  
40 343 medication management and preventing adverse health outcomes. In addition to the ACI’s  
41  
42 344 framework, the development of a proposed Medication Management Model will consider the  
43  
44 345 quadruple aim of enhancing the patient’s experience, improving population health, reducing  
45  
46 346 costs and improving the working lives of health care providers.<sup>44</sup>  
47  
48 347 Finally, our mixed-methods research findings will be completed with those of an ongoing  
49  
50 348 systematic review of Medication Management Models.<sup>45</sup>  
51  
52 349 The study phase outcomes are summarised in Table 2.

51 350 **Table 2. Outcomes for each study phase**

|                         |                                                                                                                                                                                                                                                                                                                                                                                                                                   |
|-------------------------|-----------------------------------------------------------------------------------------------------------------------------------------------------------------------------------------------------------------------------------------------------------------------------------------------------------------------------------------------------------------------------------------------------------------------------------|
| <b>Phase 1 outcomes</b> | Patient-, medication- and environment-related factors which can increase the risk of hospitalisation, emergency department visits, hospital readmission (notably due to MRPs), institutionalisation or early death.<br><br>Profiles of polymedicated, home-dwelling OAMCC hospitalised or visiting the emergency department due to MRPs based on the previously identified patient-, medication- and environment-related factors. |
|-------------------------|-----------------------------------------------------------------------------------------------------------------------------------------------------------------------------------------------------------------------------------------------------------------------------------------------------------------------------------------------------------------------------------------------------------------------------------|

|                                |                                                                                                                                                                                                                                                                                                                                                                                                                                                                                                                                                                                                                                                                                                                                                                                                                                                                                                                                                                                                                                                                                                                                                                          |
|--------------------------------|--------------------------------------------------------------------------------------------------------------------------------------------------------------------------------------------------------------------------------------------------------------------------------------------------------------------------------------------------------------------------------------------------------------------------------------------------------------------------------------------------------------------------------------------------------------------------------------------------------------------------------------------------------------------------------------------------------------------------------------------------------------------------------------------------------------------------------------------------------------------------------------------------------------------------------------------------------------------------------------------------------------------------------------------------------------------------------------------------------------------------------------------------------------------------|
| <p><b>Phase 2 outcomes</b></p> | <p>For OAMCC participants:</p> <ul style="list-style-type: none"> <li>• Patient-, medication- and environment-related factors for MRPs (defined by phase 1's outcomes) extracted from the RAI-HC MDS and the patient's electronic hospital records (number and types of medication, multiple chronic conditions, recent hospitalisations, cognitive status, hearing, vision, mood status, functional and physical status, continence, healthcare problems, nutritional state);</li> <li>• Medication practices and experiences of OAMCC following their recent hospitalisation, facilitators/barriers to medication management, informal and professional caregivers involved.</li> </ul> <p>For informal caregivers:</p> <ul style="list-style-type: none"> <li>• Sociodemographic profiles;</li> <li>• Practices and experiences related to medication management.</li> </ul> <p>For professional caregivers:</p> <ul style="list-style-type: none"> <li>• Sociodemographic and professional profiles;</li> <li>• Role and perspectives on OAMCC medication management;</li> <li>• Coordination activities related to returning home after hospitalisation.</li> </ul> |
| <p><b>Phase 3 outcomes</b></p> | <p>Three first steps in the process of developing a Model of Care<sup>43</sup>:</p> <ul style="list-style-type: none"> <li>• "Project Initiation",</li> <li>• "Diagnostic",</li> <li>• "Solution Design" considering the quadruple aim;</li> </ul> <p>Proposals for the Medication Management Model's "Implementation" and "Sustainability" steps<sup>43</sup>, to support medication management and to prevent adverse health outcomes related to MRPs.</p>                                                                                                                                                                                                                                                                                                                                                                                                                                                                                                                                                                                                                                                                                                             |

351

## 352 Patient and Public Involvement

353 This study and the feasibility study on which it is based were developed in collaboration with  
 354 representatives from a Community Healthcare Centre, a regional hospital, medical and  
 355 pharmacy associations, and an informal caregivers association. They shared their expertise on  
 356 the study's relevance and the feasibility of data collection with the research team. Patients'  
 357 priorities, experiences and preferences, collected during the feasibility study, were the drivers  
 358 for the development of the research question and outcome measures.

359 A steering committee will involve these different actors at various stages in the project, both to  
 360 contribute to data collection and to provide their expertise to the co-construction of a  
 361 Medication Management Model and its future implementation. As regards data collection, the  
 362 hospital's medical informatics department will provide the appropriate data based on a data  
 363 extraction protocol (phase 1) and the Community Healthcare Centre will help with OAMCC  
 364 recruitment and access to participants' RAI-HC and professional caregivers (phase 2).

1  
2  
3  
4 365 Results will be disseminated to study participants through presentations to associations of  
5  
6 366 patients and informal caregivers and at professional training sessions.

### 7 367 **Ethics and Dissemination**

9 368 Ethical approval has been obtained from the Human Research Ethics Committee of the Canton  
10  
11 369 Vaud (CER-VD) (2018-02196). With this approval, the medical informatics department of  
12  
13 370 partner hospital will provide the appropriate data for the retrospective phase based on a data  
14  
15 371 extraction protocol. Extracted data will be delivered and stored in the ReDCap® data platform  
16  
17 372 via a secure coded data file. In coherence with the Data Management Plan submitted to the  
18  
19 373 Swiss National Science Foundation (NSF), the collected data will be securely stored for future  
20  
21 374 research.

22 375 The autonomy of the participants will be respected. Participation in the prospective phase in  
23  
24 376 this research is free. It will be possible for participants to refuse to record the interview or to  
25  
26 377 request the deletion of the recorded data. Participating in a structured effort to understand  
27  
28 378 medication practises and the post-hospital return home experience can contribute to  
29  
30 379 improvements in health management in the community at large, and particularly in the area of  
31  
32 380 home support.

33 381 Findings will be disseminated in peer-reviewed journals, professional conferences and other  
34  
35 382 knowledge transfer activities with primary healthcare providers, hospital care units, informal  
36  
37 383 caregiver and patient associations.

38 384

### 39 385 **Authors' contributions**

40 386 FP, PR and HV had the original idea. MSD, AVG, BW, MMM and HV provided conceptual  
41  
42 387 and methodological expertise to the design of the research protocol. FP, PR and HV were major  
43  
44 388 contributors to writing the manuscript. All authors read, edited and approved the final  
45  
46 389 manuscript.

47 390

### 49 391 **Funding statement**

50 392 This work is supported by the Swiss National Science Foundation grant number  
51  
52 393 407440\_183434/1.

54 394

### 56 395 **Competing interest statement**

57 396 None declared.  
58  
59  
60

1  
2  
3  
4  
5  
6  
7  
8  
9  
10  
11  
12  
13  
14  
15  
16  
17  
18  
19  
20  
21  
22  
23  
24  
25  
26  
27  
28  
29  
30  
31  
32  
33  
34  
35  
36  
37  
38  
39  
40  
41  
42  
43  
44  
45  
46  
47  
48  
49  
50  
51  
52  
53  
54  
55  
56  
57  
58  
59  
60

397 **Data sharing statement**

398 The data collected and analysed during the study will be available from the principal  
399 investigator on reasonable request.

400

401 **Word Count:** 4'126.

For peer review only

## 402 REFERENCES

- 403 1. Bachmann N, Burla L, Kohler D, et al. La santé en Suisse-Le point sur les maladies  
404 chroniques: Rapport national sur la santé . Retrieved from Berne: & Older people's  
405 experiences of medicine changes on leaving hospital. *Research in Social and*  
406 *Administrative Pharmacy* 2015;10:791-800.
- 407 2. Marengoni A, Angleman S, Melis R, et al. Aging with multimorbidity: A systematic review  
408 of the literature. *Ageing Research Reviews* 2011;10:430-39. doi:  
409 10.1016/j.arr.2011.03.003
- 410 3. Valderas JM, Starfield B, Sibbald B, et al. Defining comorbidity: implications for  
411 understanding health and health services. *Annals Of Family Medicine* 2009;7:357-63.  
412 doi: 10.1370/afm.983.Martin
- 413 4. WHO. Innovative care for chronic conditions: building blocks for action: global report.  
414 Global Report, Geneva: World Health Organization, 2002.
- 415 5. Maher RL, Hanlon J, Hajjar ER. Clinical consequences of polypharmacy in elderly. *Expert*  
416 *Opinion on Drug Safety* 2014;13:57-65. doi: 10.1517/14740338.2013.827660
- 417 6. Masnoon N, Shakib S, Kalisch-Ellett L, et al. What is polypharmacy? A systematic review  
418 of definitions. *BMC Geriatrics* 2017;17:1-10. doi: 10.1186/s12877-017-0621-2
- 419 7. Monégat M, Sermet In collaboration with Marc Perronnin C, Rococo E. Polypharmacy:  
420 definitions, measurement and stakes involved. Review of the literature and  
421 measurement tests. 2014
- 422 8. Al Hamid A, Ghaleb M, Aljadhey H, et al. A systematic review of hospitalization resulting  
423 from medicine-related problems in adult patients. *British journal of clinical*  
424 *pharmacology* 2014;78:202-17. doi: 10.1111/bcp.12293
- 425 9. Renom-Guiteras A, Meyer G, Thürmann PA. The EU (7)-PIM list: a list of potentially  
426 inappropriate medications for older people consented by experts from seven European  
427 countries. *European journal of clinical pharmacology* 2015;71(7):861-75.
- 428 10. Nickel CH, Ruedinger JM, Messmer AS, et al. Drug - related emergency department visits  
429 by elderly patients presenting with non-specific complaints. *Scandinavian Journal of*  
430 *Trauma, Resuscitation and Emergency Medicine* 2013;21:15. doi: 10.1186/1757-  
431 7241-21-15
- 432 11. Fallis BA, Dhalla IA, Klemensberg J, et al. Primary medication non-adherence after  
433 discharge from a general internal medicine service. *PLoS ONE* 2013;8  
434 doi:10.1371/journal.pone.0061735 2013;8 doi: 10.1371/journal.pone.0061735
- 435 12. Bonnet-Zamponi D, d'Arailh L, Konrat C, et al. Drug-Related Readmissions to Medical  
436 Units of Older Adults Discharged from Acute Geriatric Units: Results of the  
437 Optimization of Medication in AGEd Multicenter Randomized Controlled Trial.  
438 *Journal of the American Geriatrics Society* 2013;61:113-21. doi: 10.1111/jgs.12037
- 439 13. Gilbert A, Roughead L, McDermott R, et al. Multiple Chronic Health Conditions in Older  
440 People: Implications for Health Policy Planning, Practitioners and Patients. University  
441 of South Australia 2013 [Ageing well ageing productively: people living with multiple  
442 chronic health conditions [1-48]. Available from:  
443 [https://www.unisa.edu.au/siteassets/episerver-6-](https://www.unisa.edu.au/siteassets/episerver-6-files/global/health/sansom/documents/qumprc/multiple-chronic-health-conditions.pdf)  
444 [files/global/health/sansom/documents/qumprc/multiple-chronic-health-conditions.pdf](https://www.unisa.edu.au/siteassets/episerver-6-files/global/health/sansom/documents/qumprc/multiple-chronic-health-conditions.pdf).
- 445 14. Roughead EE, Vitry AI, Caughey GE, et al. Multimorbidity, care complexity and  
446 prescribing for the elderly. *Ageing Health* 2011;7:695-705. doi: 10.2217/ahe.11.64
- 447 15. O'Quin KE, Semalulu T, Orom H. Elder and caregiver solutions to improve medication  
448 adherence. *Health Education Research* 2015;30:323-35. doi: 10.1093/her/cyv009



16. Gillespie R, Mullan J, Harrison L. Managing medications: The role of informal caregivers of older adults and people living with dementia. A review of the literature. *Journal of Clinical Nursing* 2014;23:3296-308. doi: 10.1111/jocn.12519
17. Look KA, Stone JA. Medication management activities performed by informal caregivers of older adults. *Research in Social and Administrative Pharmacy* 2018;14:418-26. doi: 10.1016/j.sapharm.2017.05.005
18. Reinhard SC, Levine C, Samis S. Home alone: family caregivers providing complex chronic care. *Bmj* 2012;41. doi: 10.1136/bmj.39188.434630.59
19. Pellegrin KL, Lee E, Uyeno R, et al. Potentially preventable medication-related hospitalizations: A clinical pharmacist approach to assessment, categorization, and quality improvement. *Journal of the American Pharmacists Association* 2017;57:711-16. doi: 10.1016/j.japh.2017.06.019
20. Almanasreh E, Moles R, Chen TF. The medication reconciliation process and classification of discrepancies: a systematic review. *British journal of clinical pharmacology* 2016;82(3):645-58. doi: 10.1111/bcp.13017 [published Online First: 2016/05/21]
21. IHI. How-to guide: prevent adverse drug events by implementing medication reconciliation. Cambridge, Massachusetts, USA: Institute for Healthcare Improvement, 2011.
22. Barnsteiner JH. Medication Reconciliation. In: Hughes RG, ed. Patient Safety and Quality: An Evidence-Based Handbook for Nurses. Rockville (MD)2008.
23. Creswell JW, Plano Clark VL. Improving medication management in home care: issues and solutions. 2011:155p. [published Online First: 2nd]
24. OECD. Health Status : Life expectancy 2018 [updated July 2, 2019. Available from: <https://stats.oecd.org/index.aspx?queryid=30114> accessed Aug 1, 2019
25. Vassar M, Holzmann M. The retrospective chart review: important methodological considerations. *Journal of Educational Evaluation for Health Professions* 2013;10:12. doi: 10.3352/jeehp.2013.10.12
26. Motheral B, Brooks J, Clark MA. A checklist for retrospective database studies - Report of the ISPOR Task Force on Retrospective Databases. *Value Health*, 2003:90-7.
27. Holzer B. SwissDRG – L'essentiel en bref. *Bulletin des médecins suisses* 2012;93:1079-81.
28. OFS. Classification Suisse des Interventions Chirurgicales (CHOP): Office fédéral de la statistique, 2018.
29. Roux P, Pereira F, Santiago-Delefosse M, et al. Medication practices and experiences of older adults discharged home from hospital: a feasibility study protocol. *Patient Preference and Adherence* 2018;Volume 12:1055-63. doi: 10.2147/PPA.S160990
30. Evans J, Jones P. The walking interview: Methodology, mobility and place. *Applied Geography* 2011;31:849-58.
31. Monod S, Büla C, Hongler T, et al. Le Resident Assessment Instrument-Home-Care (RAI-Domicile) : ce que le médecin de premier recours doit savoir. *Revue Médicale Suisse* 2011;7:2176-83.
32. Guest G, Bunce A, Johnson L. How Many Interviews Are Enough? *Field Methods* 2006;18:59-82. doi: 10.1177/1525822X05279903
33. Vaud Éd. Commission consultative du soutien aux proches aidants | État de Vaud. *Site Officiel État de Vaud* 2018
34. Knight DA, Thompson D, Mathie E, et al. Seamless care? Just a list would have helped!'Older people and their carer's experiences of support with medication on

- 1  
2  
3  
4 497 discharge home from hospital. *Health Expectations* 2013;16:277-91. doi:  
5 498 10.1111/j.1369-7625.2011.00714.x  
6  
7 499 35. Dew K, Chamberlain K, Hodgetts D, et al. Home as a hybrid centre of medication  
8 500 practice. *Sociology of health illness* 2014;36:28-43.  
9 501 36. Carpiano RM. Come take a walk with me: The “Go-Along” interview as a novel method  
10 502 for studying the implications of place for health and well-being. *Health place*  
11 503 2009;15:263-72.  
12 504 37. Fainzang S. Les médicaments dans l’espace privé. *Anthropologie et Sociétés* 2003;27:139.  
13 505 doi: 10.7202/007450ar  
14 506 38. Haxaire C. « Calmer les nerfs » : automédication, observance et dépendance à l’égard des  
15 507 médicaments psychotropes. *Sciences sociales et santé* 2002;20:63-88. doi:  
16 508 10.3406/sosan.2002.1545  
17  
18 509 39. Polak L, Green J. Using Joint Interviews to Add Analytic Value. *Qualitative Health*  
19 510 *Research* 2016;26:1638-48. doi: 10.1177/1049732315580103  
20 511 40. Braun V, Clarke V. Qualitative Research in Psychology Using thematic analysis in  
21 512 psychology Using thematic analysis in psychology. *Qualitative Research in*  
22 513 *Psychology* 2006;3:77-101. doi: 10.1191/1478088706qp063oa  
23 514 41. Elo S, Kyngäs H. The qualitative content analysis process. *Journal of Advanced Nursing*  
24 515 2008;62:107-15. doi: 10.1111/j.1365-2648.2007.04569.x  
25 516 42. Ratinaud P, Déjean S. IRaMuTeQ: implémentation de la méthode ALCESTE d’analyse de  
26 517 texte dans un logiciel libre. *Modélisation Appliquée aux Sciences Humaines et*  
27 518 *Sociales MASHS* 2009:8-9.  
28  
29 519 43. ACI. Understanding the process to develop a Model of Care: An ACI Framework.  
30 520 Chatswood: Agency for Clinical Innovation 2013.  
31 521 44. Bodenheimer T, Sinsky C. From triple to quadruple aim: care of the patient requires care  
32 522 of the provider. *Ann Fam Med* 2014;12(6):573-6. doi: 10.1370/afm.1713 [published  
33 523 Online First: 2014/11/12]  
34 524 45. Pereira F, Roux P, Rosselet Amoussou J, et al. Medication Management Models for  
35 525 Polymedicated Home-Dwelling Older Adults With Multiple Chronic Conditions:  
36 526 Protocol of a Systematic Review. *JMIR Res Protoc* 2019;8(5):e13582. doi:  
37 527 10.2196/13582 [published Online First: 2019/05/30]  
38  
39  
40 528  
41  
42  
43  
44  
45  
46  
47  
48  
49  
50  
51  
52  
53  
54  
55  
56  
57  
58  
59  
60



1  
2  
3  
4  
5  
6  
7  
8  
9  
10  
11  
12  
13  
14  
15  
16  
17  
18  
19  
20  
21  
22  
23  
24  
25  
26  
27  
28  
29  
30  
31  
32  
33  
34  
35  
36  
37  
38  
39  
40  
41  
42  
43  
44  
45  
46  
47  
48  
49  
50  
51  
52  
53  
54  
55  
56  
57  
58  
59  
60

For peer review only

Rapport de travail - partie quantitative

Zhivko Taushanov

July 11, 2019

# Contents

|                                                                   |          |
|-------------------------------------------------------------------|----------|
| <b>1 Cluster analysis</b>                                         | <b>4</b> |
| 1.1 Introduction and clustering methods                           | 4        |
| 1.1.1 Methods of clustering of Mixed variables data               | 4        |
| 1.2 Psychological variables (green)                               | 5        |
| 1.2.1 Data overview and strategies                                | 5        |
| 1.2.2 Clustering of psychological variables                       | 5        |
| 1.2.3 Clustering of individuals                                   | 5        |
| 1.3 Somatic/physiologic variables (orange)                        | 7        |
| 1.3.1 Data overview and strategies                                | 7        |
| 1.3.2 Clustering of variables                                     | 7        |
| 1.3.3 Clustering of individuals within the physiologic sub-groups | 8        |

# Introduction

## Dataset

**Two datasets** are available for this study at the moment: one containing the hospitalizations in the Valais hospital and one of the emergency admissions. The former plays a central role in this project and will be used most often in this document.

The hospitalizations data set contains distinct variables, most of which are measured twice: at the admission and at the discharge from the hospital. The total number of variables is then 174. After selecting only the population of interest, i.e. individuals aged 65 or more and living at home before the hospitalization, we finally obtain a sample of 36'792 hospitalizations. All observations have been collected between 2015 and 2018.

These variables are not completely independent and may be regrouped in several groups according to the dimension they are measuring as shown in figure 1. To begin we will analyze only the condition of the individuals **entering** the hospital.

The major groups of information can be split on: somatic/physical condition, psychological condition, number of medicines, diagnose(s), interventions and information on the medical course. Furthermore the precise medications will also be investigated.

Besides these most obvious distinctions between the variables, other underlying subgroups might also be present within these groups. This will be the subject of a complementary analysis within some groups. Therefore we will verify the presence of an interpretable **clustering of the variables** within a group before clustering the individuals.

## Clustering approach

The **large number of variables** in the data set makes it difficult to investigate the relations between the different factors and the risk of critical health events. Therefore the possibility to put all variables in the same model may be not an optimal choice of modeling if we consider the multi-dimensionality problem and the dependence between the variables.

An **alternative approach** will be considered in this study. Here we will make use of the important information provided by the experts in healthcare, that is the presence of clear groups within the set of **variables**.

For the cases when this grouping is not very clear, we may rely on the expert's decision. However this is not always sufficient and we also need to employ statistical methods to cluster the variables. The results of these methods will be compared to the experts opinion and will serve as a **validation tool** in order to limit a possible bias from the experts point of view or to propose a solution to an unclear relation. Both methods should be performed independently.

A hierarchical cluster analysis using the R package "ClustOfVar" is suggested in this paper. As each statistical analysis, its result should not be accepted as they appear, but should be taken as suggestions or questions instead.

|                              |                                        |                                              |                |
|------------------------------|----------------------------------------|----------------------------------------------|----------------|
| somatic / physical condition | Mobility - moving I / O                | Perception / vigilance I / O                 | psychological  |
|                              | Mobility - position change Ent/Exit    | Orientation (person, time, place) I / O      |                |
|                              | Altered gait I / O                     | Ability to learn I / O                       |                |
|                              | Balance disorders I / O                | Skill of daily life I / O                    |                |
|                              | Past falls I / O                       | Attention                                    |                |
|                              | Recent falls                           | Medic. inc. Risk of falling / delirium I / O | med.           |
|                              | Exhaustion I / O                       | Number of drugs at the entrance              |                |
|                              | Body Care - Upper Body I / O           | Number of drugs on the way out               | diagnoses      |
|                              | Body Care - Lower Body I / O           | CIM-10 main diagnosis                        |                |
|                              | Dress and undress - upper body I / O   | CIM-10 Comorb1                               |                |
|                              | Dress and undress - lower body I / O   | CIM-10 Comorb2                               |                |
|                              | Eating I / O                           | CIM-10 Comorb3                               |                |
|                              | Drinking I / O                         | CIM-10 Comorb4                               | interventions  |
|                              | Micturition I / O                      | CIM-10 Comorb5                               |                |
|                              | Defecation I / O                       | CHOP main intervention                       |                |
|                              | Hearing I / O                          | CHOP add. Inter. 1                           |                |
|                              | View I / O                             | CHOP add. Inter. 2                           |                |
|                              | Verbal expression I / O                | CHOP add. Inter. 3                           | medical course |
|                              | Drowsiness / full nights I / O         | CHOP add. Inter. 4                           |                |
|                              | Sleep rhythm I / O                     | CHOP add. Inter. 5                           |                |
|                              | Pain intensity I / O                   | Emergency service - triage                   |                |
|                              | Chronic pain I / O                     | Reason of visit                              |                |
|                              | bedsores                               | Loss of consciousness                        |                |
|                              | Sores                                  | Waiting time                                 |                |
|                              | Self-care index                        | Destination                                  |                |
|                              | Risk of bedsores (Braden) I / O        | Diagnosis                                    |                |
|                              | Risk of malnutrition I / O             | Origin                                       |                |
|                              | Risk of falling I / O                  |                                              |                |
|                              | Risk of insufficient post-hospit. care |                                              |                |
|                              | BMI                                    |                                              |                |

Figure 1: Structure of the hospitalization variables

When the final set of groups is defined, we will use statistical models to cluster the **individuals** within each group. This will provide one variable from each group, that indicates the type of characteristics that the individual displayed by his answers. For example, if we separate the individuals on three groups according to their psychological indicators, we might obtain a variable indicating that a person belongs to a group with noticeable, small or no psychological issues. This type of aggregated variables will be used in the final analysis of the risk factors.

## Further analyses and tests

The approach described above will also be compared to the more typical method of feature selection. A series of regression analyses and tests will follow both approaches to understand which characteristics are the most important risk factors for occurrence of critical health events such as hospitalization, early death etc.

## Longitudinal perspective

A longitudinal analyses may complement the research if the data allows (to be continued when we receive the identifiers).

# Chapter 1

## Cluster analysis

### 1.1 Introduction and clustering methods

#### 1.1.1 Methods of clustering of Mixed variables data

A large variety of clustering methods exist in the literature. However the majority are focused on either continuous or nominal data alone. There exist a limited number of techniques and strategies to incorporate both variables types in the same clustering partition (add all the formulas and references later):

- Distance measure. The idea is to be able to create a measure of the distance between individuals (or sequences) that includes nominal and continuous variables. The **Gower distance** is the most used such measure and is defined as: (formulas)  
However because it uses the range of continuous variables to determine the distance and assumes that nominal variables have a distance of either 0 or 1, it may under-estimate the impact of the continuous variables (which reaches 1 much less often than in the nominal variables case). Furthermore, the weights are also arbitrarily selected, however they define the contribution of each data type to the global distance (see ?? for more detailed examples). As all measure distances, Gower should be used as input for clustering methods, such as k-means for instance, to provide clustering results.
- k-means is another algorithm mainly used for continuous variables. Several other implementations, such as the R package KAMILA, integrate different types of variables together. In this particular case, it uses the probabilities of a multinomial distribution for the discrete variables. The continuous variables distribution is estimated by univariate Kernel Densities. The probabilities resulting from the both distribution types are added together to obtain a measure of how close an observation is to the center of each cluster. (formulas)
- k-medoids is a more robust version of k-means. The difference is that in k-medoids a real data points are selected as centers of the clusters, whereas in k-means the centers are the computed averages. The R package PAM is a popular implementation of this approach.
- Normal-Multivariate mixture models are another although a bit more complex but very flexible and useful alternative (to detail with formulas)
- The standard method for clustering of factor variables is the **Multiple Correspondence Analysis (MCA)**. This model is implemented in the R packages "FactoMineR" and "PCAmix". It splits all factors into multiple binary variables. Usually the principle components obtained by MCA are then clustered by a **kmeans** algorithm. (details and formulas)

1  
2  
3  
4  
5 In our analysis we tried several different clustering methods. However in the displayed results  
6 we most often used the following procedure to cluster the variables:

- 7 1. Typically one factor analysis type of model is used (such as MCA, PCA, or other depending  
8 on the data type).
- 9 2. Then the most important factors are selected. In this case we prefer to select larger number  
10 of components if it is necessary in order to keep larger part of the variation of the data. We  
11 keep in mind that our aim in this stage is to obtain an accurate clustering, rather than to  
12 reduce the dimensionality (this will be done using the final cluster partition).
- 13 3. At the end these factors are considered as variables and serve as input of an k-means clustering  
14 algorithm.
- 15 4. The number of clusters is then selected using the Silhouette statistic, but also by considering  
16 the interpretability of the resulting partition.
- 17
- 18
- 19

## 20 1.2 Psychological variables (green)

### 21 1.2.1 Data overview and strategies

22 All the **six psychological variables are ordinal**. However, together with many other variables  
23 in the data set, most often we will consider them as nominal in our analysis, because of the small  
24 number of modalities of each of these variables.

25 Some observations are excluded from the analysis because they contained only missing values.  
26 These are the first subjects in the data set and they have also been excluded from other analyses  
27 for the same reason.

28 The final sample for the following analyses contains 32'484 observations

### 29 1.2.2 Clustering of psychological variables

30 A hierarchical clustering method has been performed on the psychological variables in order to  
31 investigate any possible relation and presence of subgroups within these variables. The R package  
32 "ClustOfVar" has been used for this purpose.

33 The results do not suggest any clear interpretable structure within as illustrated by the dendro-  
34 gram in figure 1.1. They indicate that only single variables clusters (singletons) may be separated  
35 one at a time to form separate and not very distinct clusters. This information does not provide any  
36 useful solution to our problem because obviously it does not make sense to cluster the individuals  
37 over one single variable. Therefore this result, combined with the small total number of variables  
38 (only 6), lead us to the conclusion that the six psychological variables should be considered together  
39 in the same individual clustering algorithm.

### 40 1.2.3 Clustering of individuals

41 Multiple correspondence analysis has been used to cluster the individuals according to their psycho-  
42 logical state because all variables are categorical. Even though the first two principal components  
43 do not explain large part of the data (26%), we can observe the four most discriminant variables for  
44 the clustering (and the importance of their categories) on figure 1.2.

45 For further analysis we choose rather large number of principal components (9) because of the  
46 relatively low explanatory power (65% of the variance). After that we examined several different  
47 clustering partitions with respect to the number of clusters. Some particular groups and features can  
48 be systematically found in all the partitions. This allows us to make the following generalizations  
49 of the results, regardless the number of clusters:

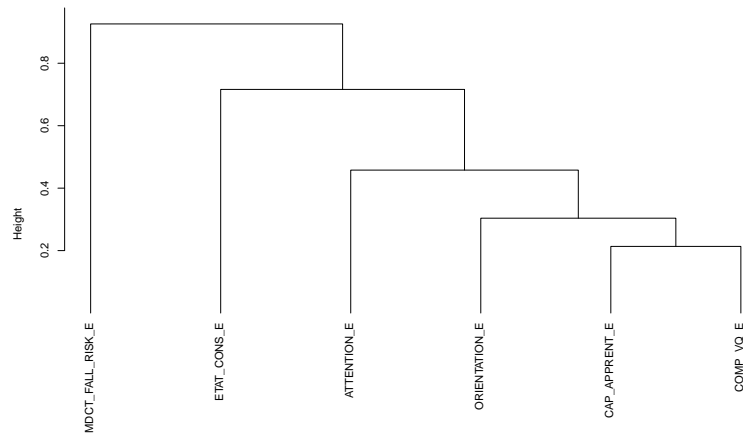

Figure 1.1: Dendrogram of psychological variables

- The majority of valid observations are displaying good condition in almost all of the variables. They are found in every clustering solution and form always the largest cluster.
- When increasing the number of clusters, the observations with average or "bad" psychological condition are split and nuanced.
- One group of individuals with predominantly missing values have been excluded from the analysis.

The optimal number of clusters is determined here by the silhouette statistic on figure 1.3. This statistic measures how similar each observation is to its own cluster, compared to all other clusters. The results indicate that two or four clusters solution would be the most appropriate in terms of within and between cluster distances. These two solutions will be resumed in this section.

### Two cluster solution

The two cluster solution is made of one dominant group of 29913 "healthy" people and one small group of inpatients in average and bad condition. On table 1.1 we observe that the two clusters are differently distributed over all 6 variables and the diagnoses (CIM). These differences are also highly significant. It is interesting to mention that much smaller part of the "healthy" group has taken medications increasing the risk of falling or delirium, 15% vs 44% of group 2.

Two other variables (number of medications and primary diagnostic) are added to the analysis for sake of exploration. They do not participate in the clustering model. No difference is observed in the average number of medications, however the primary diagnosis appear to be different among the groups.

### Four cluster solution

In the four clustering solution, the results are similar, except that we do not have a single "unhealthy" group, but three clusters with different degree of health issues.

**(INCLUDE THE TABLE FOR 4 GROUPS)**



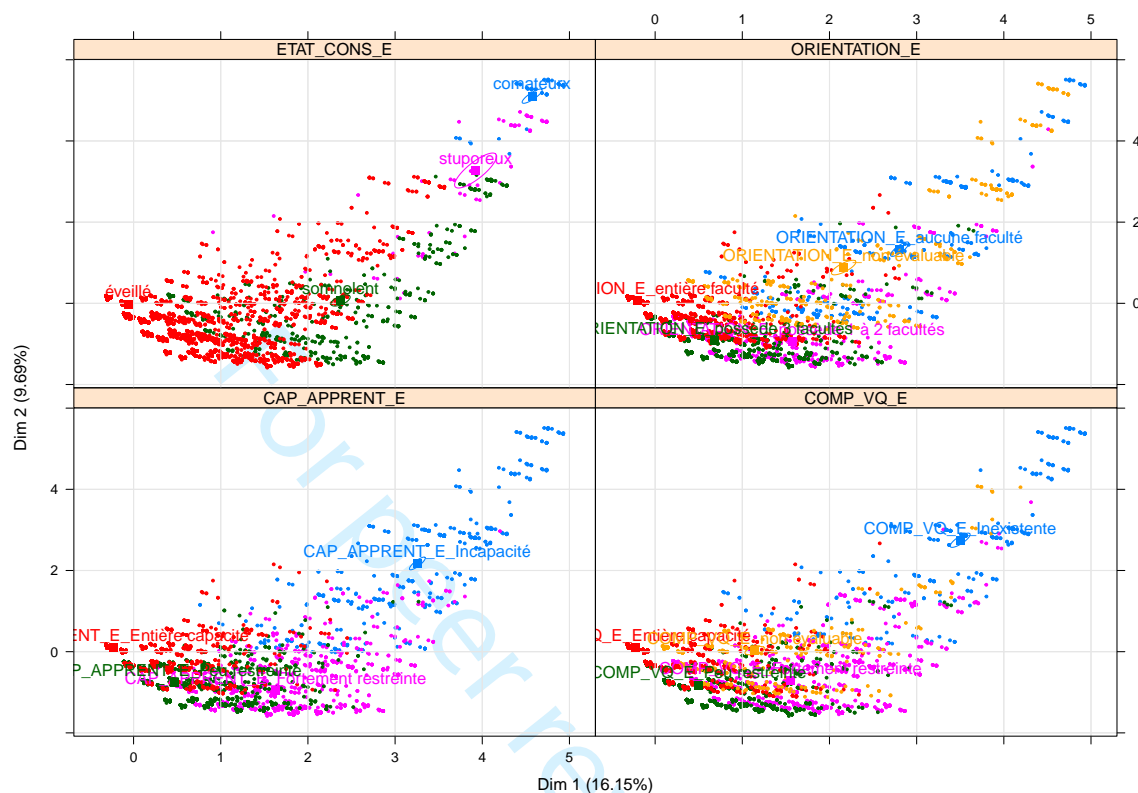

Figure 1.2: Dendrogram of psychological variables

## 1.3 Somatic/physiologic variables (orange)

### 1.3.1 Data overview and strategies

Note that several variables have modalities that do not correspond to these described in the list (see the variable description document "summaries age domicile"). These modalities have been corrected but in an arbitrary manner. Therefore a discussion over all such corrections is necessary.

At least two of the variables from the list should be considered as continuous in this group (Braden risk of sores and risk of falling, probably "Indice d'autosoins" and "risque de déficit de soins post-hospitalisation" may be also continuous), therefore we dispose with **mixed data**, and will apply the corresponding model. Both continuous variables are finally present in the second sub-group.

### 1.3.2 Clustering of variables

The number of somatic variables is relatively large to perform a direct clustering on the individuals. Furthermore, the possible presence of similarities between the variables indicate that we must consider a split of these variables in multiple sub-groups.

The initial separation of the variables has been done according to the experts knowledge of the data. However the results from a statistical model for variable clustering have also been used in order to provide an external validation of the experts point of view. These results are summarized

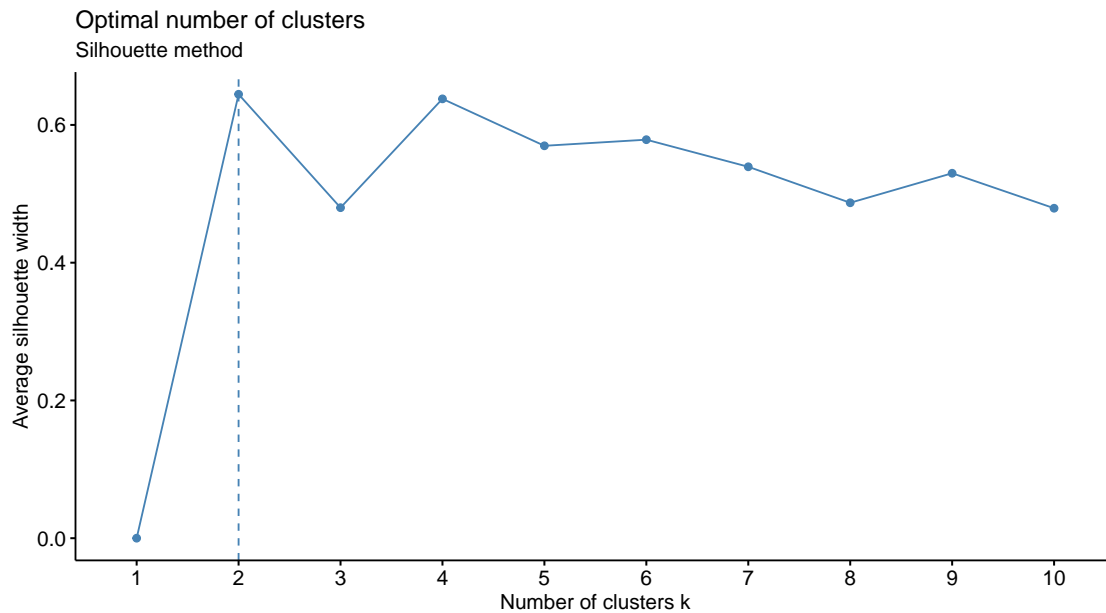

Figure 1.3: Silhouette statistic for choosing the number of clusters: two or four-cluster solution is suggested.

on figure 1.4. Even though they do not completely match the experts partition, we can observe that many of the variables can be found in the same cluster.

Initially four groups were formed: mobility, health difficulties, support for the daily life activities and other health risks.

As stated before, four groups of variable separation was the initial guess. However on table 1.3 we see that 3 of the variables in the last group "other health risks" present an excessive number of missing values: bedsores, wounds and malnutrition risk.

First, this could be a reason for unreliable results from the variable clustering for these variables, which is a reason to ignore their place in the analysis presented earlier on figure 1.4. But most importantly, it is also a burden for any further clustering of the observations if we keep these variables. Therefore the only solution is to take them out of the analysis.

The two other variables from the group: Braden risk and risk of falling are not sufficient to create an entire group of clustering. Therefore they are attached to the group "health difficulties" for the clustering of individuals. This leads to the following final three sub-groups of physiological/somatic variables displayed on table 1.4.

### 1.3.3 Clustering of individuals within the physiologic sub-groups

In this section, we will present the results of the 3 separate cluster partitions, one for each of the above-mentioned sub-groups.

#### Mobility (sub-group 1)

The optimal number of clusters  $n$  is unclear according to the silhouette statistic. It suggest rather similar and increasing values as  $n$  increases. Therefore we chose two cluster partition because this

|                                     |                |                  |                  |                 |               |       |
|-------------------------------------|----------------|------------------|------------------|-----------------|---------------|-------|
| <b>Consciousness</b>                | comateux       | stuporeux        | somnolent        | éveillé         |               | total |
| group 1                             | 0.00           | 0.00             | 0.00             | 1.00            |               | 29913 |
| group 2                             | 0.02           | 0.03             | 0.19             | 0.76            |               | 2571  |
| <b>Orientation</b>                  | aucune faculté | 1 à 2 facultés   | 3 facultés       | entière faculté | not mesurable |       |
| group 1                             | 0.0            | 0.01             | 0.05             | 0.93            | 0.00          | 29913 |
| group 2                             | 0.2            | 0.34             | 0.20             | 0.12            | 0.14          | 2571  |
| <b>Learning capacity</b>            | Incapacity     | severely reduced | slightly reduced | Full capacity   |               |       |
| group 1                             | 0.00           | 0.01             | 0.09             | 0.90            |               | 29913 |
| group 2                             | 0.22           | 0.60             | 0.12             | 0.05            |               | 2571  |
| <b>Daily life skills</b>            | Inexistant     | severely reduced | slightly reduced | Full capacity   | not mesurable |       |
| group 1                             | 0.00           | 0.01             | 0.08             | 0.90            | 0.01          | 29913 |
| group 2                             | 0.15           | 0.57             | 0.16             | 0.06            | 0.07          | 2571  |
| <b>Attention</b>                    | perm. reduced  | occas. reduced   | not affected     | not mesurable   |               |       |
| group 1                             | 0.01           | 0                | 0.98             | 0.01            |               | 29913 |
| group 2                             | 0.61           | 0                | 0.30             | 0.09            |               | 2571  |
| <b>Mdc incr. fall risk</b>          | yes            | no               |                  |                 |               |       |
| group 1                             | 0.15           | 0.85             |                  |                 |               | 29913 |
| group 2                             | 0.44           | 0.56             |                  |                 |               | 2571  |
| Additional variables (not included) |                |                  |                  |                 |               |       |
| <b>Nbr of medications</b>           | 0              | 1-3              | 4-5              | 6-9             | 10+           |       |
| group 1                             | 0.57           | 0.12             | 0.09             | 0.13            | 0.09          | 29913 |
| group 2                             | 0.65           | 0.04             | 0.06             | 0.13            | 0.12          | 2571  |
|                                     | mean for gr.1  | mean for gr.2    |                  |                 |               |       |
|                                     | 2.809748       | 2.846752         |                  |                 |               |       |
| <b>CodeCim1 REC1</b>                | other          | cancer           | mental           | sensory         | systemes      |       |
| group 1                             | 0.39           | 0.01             | 0.13             | 0.03            | 0.44          | 29913 |
| group 2                             | 0.32           | 0.01             | 0.08             | 0.04            | 0.55          | 2571  |

Table 1.1: Two clustering solution: distribution of the groups in all six psychological variables. All distributions are significantly different among clusters ( $\chi^2$ -tests, p-values<0.01), except the mean number of medications.

| Mobility          | Health difficulties   | Daily life activ. support    | Other health risks     |
|-------------------|-----------------------|------------------------------|------------------------|
| Movement          | Exhaustion            | Body care - upper body       | Sores                  |
| Changing position | Hearing               | Body care - lower body       | Wounds                 |
| Altered gait      | View                  | Dress and undress - upper b. | Malnutrition risk      |
| Balance disorders | Verbal expression     | Dress and undress - lower b. | Risk of falling        |
| Past falls        | Drowsiness Full night | Eating                       | Braden risk (of sores) |
| Recent falls      | Sleep rithm           | Drinking                     |                        |
|                   | Pain intensity        | Micturition                  |                        |
|                   | Chronic pain          | Defecation                   |                        |

Table 1.2: Initial idea for sub-groups of physiological/somatic variables

| variable       | bedsores | wounds | Braden risk | malnutrition risk | risk of falling |
|----------------|----------|--------|-------------|-------------------|-----------------|
| missing values | 98.6%    | 93.6%  | 0.3%        | 87.7%             | 44.9%           |

Table 1.3: Percentage of missing values in sub-group "other health risks"

is also the best separation in terms of interpretability of the results and implies a clear difference between the groups.

Again in table 1.5 we see that roughly  $\frac{2}{3}$  of the subjects have little or no mobility issues (group 2). The remaining individuals exhibit problems in at least one of the 6 dimensions. That number is rather large but not surprising if we consider the advanced age of the selected population.

The  $\chi^2$ -tests confirm the clear difference between the groups among all variables.

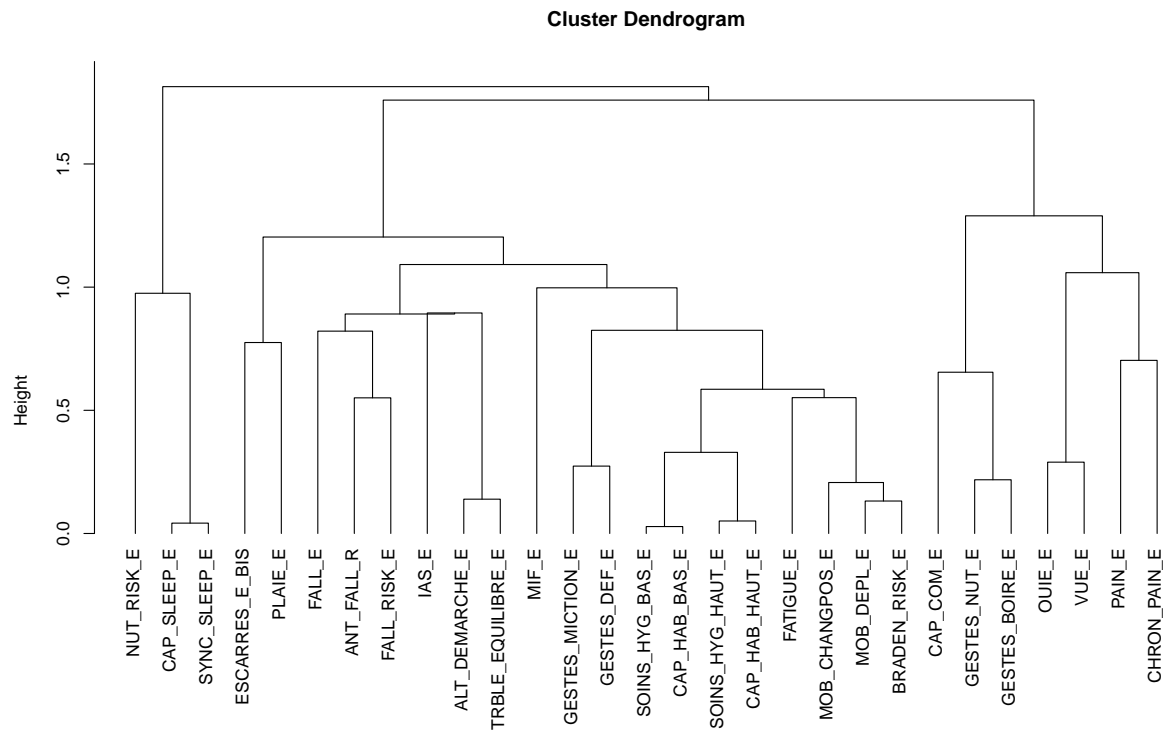

Figure 1.4: Dendrogram of physiological/somatic variables

| <b>Mobility</b>   | <b>Health difficulties</b>    | <b>Daily life activities support</b> |
|-------------------|-------------------------------|--------------------------------------|
| Movement          | Exhaustion                    | Body care - upper body               |
| Changing position | Hearing                       | Body care - lower body               |
| Altered gait      | View                          | Dress and undress - upper body       |
| Balance disorders | Verbal expression             | Dress and undress - lower body       |
| Past falls        | Drowsiness Full night         | Eating                               |
| Recent falls      | Sleep rithm                   | Drinking                             |
|                   | Pain intensity                | Micturition                          |
|                   | Chronic pain                  | Defecation                           |
|                   | <i>Braden risk (of sores)</i> |                                      |
|                   | <i>Risk of falling</i>        |                                      |

Table 1.4: Final sub-groups of physiological/somatic variables

### Health difficulties (sub-group 2)

The objective of our analysis is clustering and not dimension reduction. Therefore it is worth taking into account larger number of principal components in the analysis in order to explain larger part of the variability of the data.

| Movement                 | Incapacity | severely reduced | slightly reduced | full capacity | total |
|--------------------------|------------|------------------|------------------|---------------|-------|
| group 1                  | 0.23       | 0.37             | 0.34             | 0.06          | 11328 |
| group 2                  | 0.02       | 0.01             | 0.16             | 0.82          | 21172 |
| <b>Changing position</b> | Incapacity | severely reduced | slightly reduced | full capacity |       |
| group 1                  | 0.08       | 0.29             | 0.40             | 0.23          | 11329 |
| group 2                  | 0.00       | 0.00             | 0.05             | 0.95          | 21174 |
| <b>Altered gait</b>      | yes        | no               | not measurable   |               |       |
| group 1                  | 0.56       | 0.09             | 0.35             |               | 11331 |
| group 2                  | 0.10       | 0.90             | 0.01             |               | 21172 |
| <b>Balance disorders</b> | yes        | no               | not measurable   |               |       |
| group 1                  | 0.42       | 0.21             | 0.37             |               | 11330 |
| group 2                  | 0.06       | 0.94             | 0.00             |               | 21172 |
| <b>Past falls</b>        | yes        | no               | not measurable   |               |       |
| group 1                  | 0.33       | 0.59             | 0.08             |               | 11329 |
| group 2                  | 0.05       | 0.95             | 0.01             |               | 21170 |
| <b>Recent falls</b>      | yes        | no               |                  |               |       |
| group 1                  | 0.11       | 0.89             |                  |               | 9288  |
| group 2                  | 0.01       | 0.99             |                  |               | 12925 |

Table 1.5: Two clustering solution of the "mobility" subgroup. All distributions are significantly different among clusters ( $\chi^2$ -tests, p-values<0.01).

The silhouette statistic suggests 2, 8 or 10 clusters. Our decision is to choose 2 cluster solution for two reasons, first it corresponds to the first and most pronounced peak in the graph 1.5, but it is also more easy to interpret.

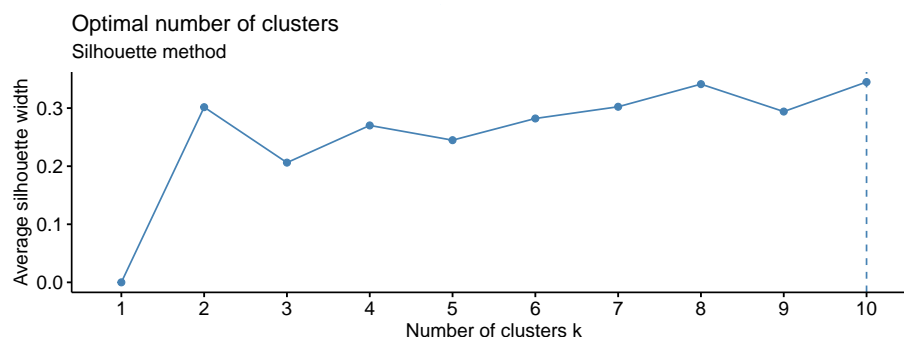

Figure 1.5: Sub-group "Health difficulties": silhouette statistic for choosing the number of clusters. Two or four-cluster solution is suggested.

Before adding the two continuous variables to this sub-group, a three cluster solution was the optimal solution, despite the excessively small size of one of the groups ( $n_3 = 241$ ). However this group is the more distinct from the rest. It comprises impatient that were probably unconscious or in very bad condition. Concerning the two other large groups, the only clearly distinctive feature between them was the higher proportion belonging to the group "not measurable" of the variables and therefore they could be merged together.

After adding both continuous variables to the analysis, we observe on figure 1.6 that both solutions are rather similar. The main difference is due to the rather large categories "not measurable" in the variables Drowsiness and Sleep rhythm.

A possible solution to this problem is to **take these variables out of the analysis** and perform a new clustering. Note that both variables are not measurable for the same individuals, which biases the result of the clustering.

|                          |                           |                               |                         |                                |                |         |       |
|--------------------------|---------------------------|-------------------------------|-------------------------|--------------------------------|----------------|---------|-------|
| <b>Exhaustion</b>        | no activity possible      | some auton.<br>a. w. recovery | occas. act.<br>possible | good phys./<br>mental strenght | not meas.      |         | total |
| group 1                  | 0.01                      | 0.12                          | 0.21                    | 0.65                           | 0.00           |         | 24034 |
| group 2                  | 0.04                      | 0.18                          | 0.25                    | 0.50                           | 0.03           |         | 8458  |
| <b>Hearing</b>           | deafness                  | auditive<br>problems          | no auditive<br>problems |                                | not meas.      |         |       |
| group 1                  | 0                         | 0.1                           | 0.90                    |                                | 0.00           |         | 24031 |
| group 2                  | 0                         | 0.1                           | 0.87                    |                                | 0.02           |         | 8460  |
| <b>View</b>              | blindness                 | visual<br>problems            | no visual<br>problems   |                                | not meas.      |         |       |
| group 1                  | 0                         | 0.07                          | 0.93                    |                                | 0.00           |         | 24032 |
| group 2                  | 0                         | 0.08                          | 0.88                    |                                | 0.03           |         | 8460  |
| <b>Verbal expression</b> | Incapacity                | Restricted                    | entire capacity         |                                |                |         |       |
| group 1                  | 0.00                      | 0.03                          | 0.96                    |                                |                |         | 24030 |
| group 2                  | 0.02                      | 0.07                          | 0.91                    |                                |                |         | 8461  |
| <b>Drowsiness</b>        | disturbed                 | no disturbance                | not measurable          |                                |                |         |       |
| group 1                  | 0.15                      | 0.84                          | 0.01                    |                                |                |         | 24029 |
| group 2                  | 0.02                      | 0.01                          | 0.97                    |                                |                |         | 8459  |
| <b>Sleep rithm</b>       | modified                  | not modified                  | not measurable          |                                |                |         |       |
| group 1                  | 0.06                      | 0.94                          | 0.00                    |                                |                |         | 24025 |
| group 2                  | 0.02                      | 0.02                          | 0.96                    |                                |                |         | 8455  |
| <b>Pain intensity</b>    | Signs of pain<br>(3-d p.) | improbable<br>(3-d p.)        | intense<br>pain         | meduim<br>pain                 | slight<br>pain | no pain |       |
| group 1                  | 0                         | 0                             | 0.03                    | 0.11                           | 0.17           | 0.69    | 24017 |
| group 2                  | 0                         | 0                             | 0.03                    | 0.11                           | 0.17           | 0.69    | 8460  |
| <b>Chronic pain</b>      | yes                       | no                            | not meas.               |                                |                |         |       |
| group 1                  | 0.08                      | 0.92                          | 0.00                    |                                |                |         | 23998 |
| group 2                  | 0.07                      | 0.87                          | 0.05                    |                                |                |         | 8457  |
| Continuous variables     |                           |                               |                         |                                |                |         |       |
| <b>Braden risk sores</b> |                           |                               |                         |                                |                |         |       |
| Welch 2 s. t-test:       | mean gr.1                 | mean gr.2                     | 95% conf. int.          |                                |                |         |       |
|                          | 21.1                      | 19.9                          | (1.08; 1.23)            |                                |                |         |       |
| <b>Risk of falling</b>   |                           |                               |                         |                                |                |         |       |
| Welch 2 s. t-test:       | mean gr.1                 | mean gr.2                     | 95% conf. int.          |                                |                |         |       |
|                          | 2.11                      | 2.39                          | (-0.33;-0.24)           |                                |                |         |       |

Table 1.6: Two clustering solution of the "Health difficulties" subgroup. Nominal and continuous variables results. All distributions are significantly different among clusters ( $\chi^2$ -tests, p-values < 0.01).

The continuous variables have also a significant difference, but it is not a sufficient reason in terms of interpretability to keep this solution.

### Daily life activities support (sub-group 3)

The Silhouette statistic is indecisive on figure 1.6, but the two cluster solution appears more appropriate and is our choice.

A brief look on the clusters in figure 1.7 is sufficient to spot the difference between groups. One large cluster of 27'233 observations is formed by mainly healthy individuals that have their full capacity on the majority of the variables. The smaller cluster 1 of 5'268 observations regroups the individuals who have at least one serious problem with their daily life activities. Overall the separation appears interesting for our aim of separating the observations. Once again the distributions of the clusters are significantly different over all variables.

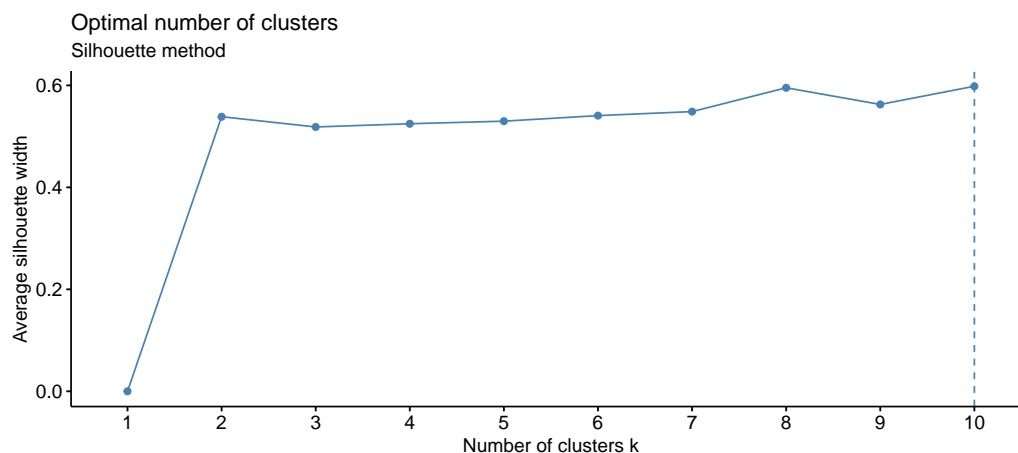

Figure 1.6: Sub-group 3 "Daily life activities support": silhouette statistic for choosing the number of clusters. Two, eight or ten-cluster solution is suggested. Two groups are chosen for sake of simplicity.

|                                  |            |                  |                  |               |       |
|----------------------------------|------------|------------------|------------------|---------------|-------|
| <b>Body care - upper b.</b>      | incapacity | severely reduced | slightly reduced | full capacity | total |
| group 1                          | 0.22       | 0.52             | 0.23             | 0.04          | 5268  |
| group 2                          | 0.00       | 0.00             | 0.23             | 0.76          | 27233 |
| <b>Body care - lower b.</b>      | incapacity | severely reduced | slightly reduced | full capacity | total |
| group 1                          | 0.53       | 0.45             | 0.02             | 0.00          | 5268  |
| group 2                          | 0.01       | 0.09             | 0.25             | 0.65          | 27233 |
| <b>Dress and undress - upper</b> | incapacity | severely reduced | slightly reduced | full capacity | total |
| group 1                          | 0.26       | 0.50             | 0.21             | 0.03          | 5268  |
| group 2                          | 0.00       | 0.01             | 0.22             | 0.78          | 27234 |
| <b>Dress and undress - lower</b> | incapacity | severely reduced | slightly reduced | full capacity | total |
| group 1                          | 0.53       | 0.45             | 0.02             | 0.00          | 5268  |
| group 2                          | 0.01       | 0.08             | 0.24             | 0.67          | 27233 |
| <b>Eating</b>                    | incapacity | severely reduced | slightly reduced | full capacity | total |
| group 1                          | 0.13       | 0.13             | 0.29             | 0.45          | 5268  |
| group 2                          | 0.01       | 0.00             | 0.02             | 0.97          | 27232 |
| <b>Drinking</b>                  | incapacity | severely reduced | slightly reduced | full capacity | total |
| group 1                          | 0.09       | 0.08             | 0.18             | 0.65          | 5268  |
| group 2                          | 0.01       | 0.00             | 0.00             | 0.99          | 27229 |
| <b>Micturition</b>               | incapacity | severely reduced | slightly reduced | full capacity | total |
| group 1                          | 0.31       | 0.24             | 0.21             | 0.23          | 5267  |
| group 2                          | 0.04       | 0.01             | 0.08             | 0.88          | 27224 |
| <b>Defecation</b>                | incapacity | severely reduced | slightly reduced | full capacity | total |
| group 1                          | 0.17       | 0.28             | 0.19             | 0.36          | 5267  |
| group 2                          | 0.00       | 0.00             | 0.06             | 0.94          | 27227 |

Table 1.7: Two clustering solution of the "Daily life activities support" subgroup. All distributions are significantly different among clusters ( $\chi^2$ -tests, p-values<0.01).



1  
2  
3  
4  
5  
6  
7  
8  
9  
10  
11  
12  
13  
14  
15  
16  
17  
18  
19  
20  
21  
22  
23  
24  
25  
26  
27  
28  
29  
30  
31  
32  
33  
34  
35  
36  
37  
38  
39  
40  
41  
42  
43  
44  
45  
46  
47  
48  
49  
50  
51  
52  
53  
54  
55  
56  
57  
58  
59  
60

# Bibliography

[1] A semiparametric method for clustering mixed data. Foss. *Machine Learning*. 2016

For peer review only
